# Supplementary material for: Diversity and ice nucleation activity of Pseudomonas syringae in drone-based water samples from eight lakes in Austria
Source: PeerJ. 2023 Nov 28;11:e16390. doi: 10.7717/peerj.16390 (PMC10691352; doi:10.7717/peerj.16390)
Supplement: Supplemental Information 1 [file peerj-11-16390-s001.xlsx]

## Sheet: LIST_sorted_by_Haplotype
1				Haplotype#		1	2	3	4	5	6	7	8	9	10	11	12	13	14	15	16	17	18	19	20	21	22	23	24	25	26	27	28	29	30	31	32	33	34	35	36	37	38	39	40	41	42	43	44
Original order (CEM)	Lake code	Basin	# Lake	Isolate ID	HT_PG	01_PG02	02_PG02	03_PG02	04_PG02	05_PG02	06_PG02	07_PG02	08_PG01ex	09_PG01	10_PG01	11_PG01	12_PG01	13_PG10	14_PG07	15_PG07	16_PG07	17_PG07	18_PG09	19_PG09	20_PG09	21_PG09	22_PG09	23_PG14ex	24_PG15ex	25_PG13	26_PG13	27_PG13	28_PG13	29_PG13	30_PG13ex	31_PG13ex	32_PG13ex	33_PAOex	34_PAOex	35_PAOex	36_PAOex	37_PAOex	38_PAOex	39_PAOex	40_PAOex	41_PAOex	42_PAOsx	43_PAOex	44_PG17ex
1	HIN	Basin_1_A(top)	Lake 6	LK6K4C	01_PG02	1
2	HIN	Basin_1_A(top)	Lake 6	LK6K4D	01_PG02	1
3	HIN	Basin_1_A(top)	Lake 6	LK6K4H	01_PG02	1
4	HIN	Basin_1_A(top)	Lake 6	LK6K5B	01_PG02	1
6	HIN	Basin_1_A(top)	Lake 6	LK6K5D	01_PG02	1
9	HIN	Basin_1_A(top)	Lake 6	LK6K6A	01_PG02	1
10	HIN	Basin_1_A(top)	Lake 6	LK6K6C	01_PG02	1
11	HIN	Basin_1_A(top)	Lake 6	LK6K6E	01_PG02	1
12	HIN	Basin_1_A(top)	Lake 6	LK6K6H	01_PG02	1
13	HIN	Basin_1_A(top)	Lake 6	LK6K7D	01_PG02	1
16	HIN	Basin_1_A(top)	Lake 6	LK6K8F	01_PG02	1
17	HIN	Basin_1_A(top)	Lake 6	LK6K8H	01_PG02	1
18	HIN	Basin_1_A(top)	Lake 6	LK6K9A	01_PG02	1
19	HIN	Basin_1_A(top)	Lake 6	LK6K9B	01_PG02	1
20	HIN	Basin_1_A(top)	Lake 6	LK6K9F	01_PG02	1
21	HIN	Basin_1_A(top)	Lake 6	LK6K9H	01_PG02	1
26	GOL	Basin_1_B(mid)	Lake 5	LK5K2A	01_PG02	1
27	GOL	Basin_1_B(mid)	Lake 5	LK5K2B	01_PG02	1
28	GOL	Basin_1_B(mid)	Lake 5	LK5K2C	01_PG02	1
32	GOL	Basin_1_B(mid)	Lake 5	LK5K4C	01_PG02	1
46	GOS	Basin_1_C(low)	Lake 3	LK3K1B	01_PG02	1
47	GOS	Basin_1_C(low)	Lake 3	LK3K1C	01_PG02	1
48	GOS	Basin_1_C(low)	Lake 3	LK3K1D	01_PG02	1
49	GOS	Basin_1_C(low)	Lake 3	LK3K1H	01_PG02	1
50	GOS	Basin_1_C(low)	Lake 3	LK3K2B	01_PG02	1
52	GOS	Basin_1_C(low)	Lake 3	LK3K2F	01_PG02	1
53	GOS	Basin_1_C(low)	Lake 3	LK3K2G	01_PG02	1
55	GOS	Basin_1_C(low)	Lake 3	LK3K3B	01_PG02	1
57	GOS	Basin_1_C(low)	Lake 3	LK3K4E	01_PG02	1
58	GOS	Basin_1_C(low)	Lake 3	LK3K4G	01_PG02	1
59	GOS	Basin_1_C(low)	Lake 3	LK3K4H	01_PG02	1
60	GOS	Basin_1_C(low)	Lake 3	LK3K5B	01_PG02	1
61	GOS	Basin_1_C(low)	Lake 3	LK3K5C	01_PG02	1
62	GOS	Basin_1_C(low)	Lake 3	LK3K5D	01_PG02	1
63	GOS	Basin_1_C(low)	Lake 3	LK3K5F	01_PG02	1
64	GOS	Basin_1_C(low)	Lake 3	LK3K5G	01_PG02	1
65	GOS	Basin_1_C(low)	Lake 3	LK3K5H	01_PG02	1
66	GOS	Basin_1_C(low)	Lake 3	LK3K6B	01_PG02	1
68	GOS	Basin_1_C(low)	Lake 3	LK3K6D	01_PG02	1
69	GOS	Basin_1_C(low)	Lake 3	LK3K6F	01_PG02	1
219	OSS	Basin_4_A(top)	Lake 8	LK8K1A	01_PG02	1
238	OSS	Basin_4_A(top)	Lake 8	LK8K4B	01_PG02	1
239	OSS	Basin_4_A(top)	Lake 8	LK8K4C	01_PG02	1
240	OSS	Basin_4_A(top)	Lake 8	LK8K4E	01_PG02	1
241	OSS	Basin_4_A(top)	Lake 8	LK8K4F	01_PG02	1
242	OSS	Basin_4_A(top)	Lake 8	LK8K4H	01_PG02	1
243	OSS	Basin_4_A(top)	Lake 8	LK8K5A	01_PG02	1
51	GOS	Basin_1_C(low)	Lake 3	LK3K2C	02_PG02		1
184	GRU	Basin_3_B(low)	Lake 2	LK2K3F	03_PG02			1
216	GRU	Basin_3_B(low)	Lake 2	LK2K9D	03_PG02			1
217	GRU	Basin_3_B(low)	Lake 2	LK2K9F	03_PG02			1
218	GRU	Basin_3_B(low)	Lake 2	LK2K9H	03_PG02			1
230	OSS	Basin_4_A(top)	Lake 8	LK8K2G	03_PG02			1
29	GOL	Basin_1_B(mid)	Lake 5	LK5K2F	04_PG02				1
70	GOS	Basin_1_C(low)	Lake 3	LK3K6G	04_PG02				1
113	TOP	Basin_3_A(top)	Lake 4	LK4K1G	04_PG02				1
133	TOP	Basin_3_A(top)	Lake 4	LK4K4C	04_PG02				1
151	TOP	Basin_3_A(top)	Lake 4	LK4K7B	04_PG02				1
152	TOP	Basin_3_A(top)	Lake 4	LK4K7C	04_PG02				1
154	TOP	Basin_3_A(top)	Lake 4	LK4K7E	04_PG02				1
160	TOP	Basin_3_A(top)	Lake 4	LK4K8D	04_PG02				1
164	TOP	Basin_3_A(top)	Lake 4	LK4K9B	04_PG02				1
195	GRU	Basin_3_B(low)	Lake 2	LK2K5E	04_PG02				1
200	GRU	Basin_3_B(low)	Lake 2	LK2K6D	04_PG02				1
167	GRU	Basin_3_B(low)	Lake 2	LK2K1B	05_PG02					1
181	GRU	Basin_3_B(low)	Lake 2	LK2K3C	05_PG02					1
210	GRU	Basin_3_B(low)	Lake 2	LK2K7G	05_PG02					1
211	GRU	Basin_3_B(low)	Lake 2	LK2K7H	05_PG02					1
227	OSS	Basin_4_A(top)	Lake 8	LK8K2C	05_PG02					1
254	OSS	Basin_4_A(top)	Lake 8	LK8K7C	05_PG02					1
257	OSS	Basin_4_A(top)	Lake 8	LK8K7H	05_PG02					1
259	OSS	Basin_4_A(top)	Lake 8	LK8K8B	05_PG02					1
262	OSS	Basin_4_A(top)	Lake 8	LK8K8E	05_PG02					1
263	OSS	Basin_4_A(top)	Lake 8	LK8K8F	05_PG02					1
207	GRU	Basin_3_B(low)	Lake 2	LK2K7D	06_PG02						1
175	GRU	Basin_3_B(low)	Lake 2	LK2K2C	07_PG02							1
177	GRU	Basin_3_B(low)	Lake 2	LK2K2F	07_PG02							1
179	GRU	Basin_3_B(low)	Lake 2	LK2K2H	07_PG02							1
208	GRU	Basin_3_B(low)	Lake 2	LK2K7E	07_PG02							1
214	GRU	Basin_3_B(low)	Lake 2	LK2K9A	07_PG02							1
266	OSS	Basin_4_A(top)	Lake 8	LK8K9D	08_PG01								1
267	OSS	Basin_4_A(top)	Lake 8	LK8K9H	08_PG01								1
155	TOP	Basin_3_A(top)	Lake 4	LK4K7F	09_PG01									1
166	GRU	Basin_3_B(low)	Lake 2	LK2K1A	10_PG01										1
56	GOS	Basin_1_C(low)	Lake 3	LK3K4C	11_PG01											1
145	TOP	Basin_3_A(top)	Lake 4	LK4K6C	11_PG01											1
22	GOL	Basin_1_B(mid)	Lake 5	LK5K1B	12_PG01												1
156	TOP	Basin_3_A(top)	Lake 4	LK4K7H	12_PG01												1
168	GRU	Basin_3_B(low)	Lake 2	LK2K1C	13_PG10													1
79	GOS	Basin_1_C(low)	Lake 3	LK3K8A	14_PG07														1
81	GOS	Basin_1_C(low)	Lake 3	LK3K8D	14_PG07														1
114	TOP	Basin_3_A(top)	Lake 4	LK4K1H	14_PG07														1
118	TOP	Basin_3_A(top)	Lake 4	LK4K2D	14_PG07														1
122	TOP	Basin_3_A(top)	Lake 4	LK4K2H	14_PG07														1
143	TOP	Basin_3_A(top)	Lake 4	LK4K6A	14_PG07														1
187	GRU	Basin_3_B(low)	Lake 2	LK2K4C	14_PG07														1
201	GRU	Basin_3_B(low)	Lake 2	LK2K6E	14_PG07														1
260	OSS	Basin_4_A(top)	Lake 8	LK8K8C	14_PG07														1
261	OSS	Basin_4_A(top)	Lake 8	LK8K8D	14_PG07														1
269	WOR	Basin_4_B(low)	Lake 7	LK7K5C	14_PG07														1
178	GRU	Basin_3_B(low)	Lake 2	LK2K2G	15_PG07															1
5	HIN	Basin_1_A(top)	Lake 6	LK6K5C	16_PG07																1
7	HIN	Basin_1_A(top)	Lake 6	LK6K5F	16_PG07																1
138	TOP	Basin_3_A(top)	Lake 4	LK4K5B	16_PG07																1
139	TOP	Basin_3_A(top)	Lake 4	LK4K5C	16_PG07																1
141	TOP	Basin_3_A(top)	Lake 4	LK4K5E	16_PG07																1
142	TOP	Basin_3_A(top)	Lake 4	LK4K5F	16_PG07																1
144	TOP	Basin_3_A(top)	Lake 4	LK4K6B	16_PG07																1
146	TOP	Basin_3_A(top)	Lake 4	LK4K6D	16_PG07																1
161	TOP	Basin_3_A(top)	Lake 4	LK4K8E	16_PG07																1
193	GRU	Basin_3_B(low)	Lake 2	LK2K5C	16_PG07																1
196	GRU	Basin_3_B(low)	Lake 2	LK2K5F	16_PG07																1
191	GRU	Basin_3_B(low)	Lake 2	LK2K5A	17_PG07																	1
192	GRU	Basin_3_B(low)	Lake 2	LK2K5B	17_PG07																	1
194	GRU	Basin_3_B(low)	Lake 2	LK2K5D	17_PG07																	1
198	GRU	Basin_3_B(low)	Lake 2	LK2K5H	17_PG07																	1
132	TOP	Basin_3_A(top)	Lake 4	LK4K4B	18_PG09																		1
147	TOP	Basin_3_A(top)	Lake 4	LK4K6E	18_PG09																		1
148	TOP	Basin_3_A(top)	Lake 4	LK4K6F	18_PG09																		1
149	TOP	Basin_3_A(top)	Lake 4	LK4K6G	18_PG09																		1
150	TOP	Basin_3_A(top)	Lake 4	LK4K6H	18_PG09																		1
222	OSS	Basin_4_A(top)	Lake 8	LK8K1D	18_PG09																		1
264	OSS	Basin_4_A(top)	Lake 8	LK8K8H	19_PG09																			1
123	TOP	Basin_3_A(top)	Lake 4	LK4K3A	20_PG09																				1
124	TOP	Basin_3_A(top)	Lake 4	LK4K3B	20_PG09																				1
125	TOP	Basin_3_A(top)	Lake 4	LK4K3C	20_PG09																				1
126	TOP	Basin_3_A(top)	Lake 4	LK4K3D	20_PG09																				1
127	TOP	Basin_3_A(top)	Lake 4	LK4K3E	20_PG09																				1
128	TOP	Basin_3_A(top)	Lake 4	LK4K3F	20_PG09																				1
129	TOP	Basin_3_A(top)	Lake 4	LK4K3G	20_PG09																				1
130	TOP	Basin_3_A(top)	Lake 4	LK4K3H	20_PG09																				1
134	TOP	Basin_3_A(top)	Lake 4	LK4K4D	20_PG09																				1
87	ALT	Basin_2	Lake 1	LK1K1F	21_PG09																					1
25	GOL	Basin_1_B(mid)	Lake 5	LK5K1H	22_PG09																						1
36	GOL	Basin_1_B(mid)	Lake 5	LK5K4G	22_PG09																						1
38	GOL	Basin_1_B(mid)	Lake 5	LK5K5B	22_PG09																						1
39	GOL	Basin_1_B(mid)	Lake 5	LK5K5E	22_PG09																						1
40	GOL	Basin_1_B(mid)	Lake 5	LK5K5G	22_PG09																						1
41	GOL	Basin_1_B(mid)	Lake 5	LK5K6B	22_PG09																						1
43	GOL	Basin_1_B(mid)	Lake 5	LK5K6D	22_PG09																						1
44	GOL	Basin_1_B(mid)	Lake 5	LK5K6G	22_PG09																						1
72	GOS	Basin_1_C(low)	Lake 3	LK3K7B	22_PG09																						1
73	GOS	Basin_1_C(low)	Lake 3	LK3K7C	22_PG09																						1
74	GOS	Basin_1_C(low)	Lake 3	LK3K7D	22_PG09																						1
75	GOS	Basin_1_C(low)	Lake 3	LK3K7E	22_PG09																						1
76	GOS	Basin_1_C(low)	Lake 3	LK3K7F	22_PG09																						1
77	GOS	Basin_1_C(low)	Lake 3	LK3K7G	22_PG09																						1
78	GOS	Basin_1_C(low)	Lake 3	LK3K7H	22_PG09																						1
80	GOS	Basin_1_C(low)	Lake 3	LK3K8C	22_PG09																						1
82	GOS	Basin_1_C(low)	Lake 3	LK3K8E	22_PG09																						1
83	GOS	Basin_1_C(low)	Lake 3	LK3K8F	22_PG09																						1
84	GOS	Basin_1_C(low)	Lake 3	LK3K8H	22_PG09																						1
85	GOS	Basin_1_C(low)	Lake 3	LK3K9D	22_PG09																						1
91	ALT	Basin_2	Lake 1	LK1K6C	22_PG09																						1
92	ALT	Basin_2	Lake 1	LK1K6D	22_PG09																						1
93	ALT	Basin_2	Lake 1	LK1K6E	22_PG09																						1
95	ALT	Basin_2	Lake 1	LK1K6G	22_PG09																						1
99	ALT	Basin_2	Lake 1	LK1K7E	22_PG09																						1
106	ALT	Basin_2	Lake 1	LK1K8H	22_PG09																						1
109	ALT	Basin_2	Lake 1	LK1K9C	22_PG09																						1
112	ALT	Basin_2	Lake 1	LK1K9G	22_PG09																						1
98	ALT	Basin_2	Lake 1	LK1K7D	23_PG14																							1
67	GOS	Basin_1_C(low)	Lake 3	LK3K6C	24_PG15																								1
71	GOS	Basin_1_C(low)	Lake 3	LK3K6H	24_PG15																								1
245	OSS	Basin_4_A(top)	Lake 8	LK8K5D	25_PG13																									1
247	OSS	Basin_4_A(top)	Lake 8	LK8K5H	25_PG13																									1
258	OSS	Basin_4_A(top)	Lake 8	LK8K8A	25_PG13																									1
117	TOP	Basin_3_A(top)	Lake 4	LK4K2C	26_PG13																										1
248	OSS	Basin_4_A(top)	Lake 8	LK8K6B	27_PG13																											1
153	TOP	Basin_3_A(top)	Lake 4	LK4K7D	28_PG13																												1
213	GRU	Basin_3_B(low)	Lake 2	LK2K8G	29_PG13																													1
221	OSS	Basin_4_A(top)	Lake 8	LK8K1C	30_PG13																														1
228	OSS	Basin_4_A(top)	Lake 8	LK8K2E	30_PG13																														1
231	OSS	Basin_4_A(top)	Lake 8	LK8K2H	31_PG13																															1
186	GRU	Basin_3_B(low)	Lake 2	LK2K4A	32_PG13																																1
190	GRU	Basin_3_B(low)	Lake 2	LK2K4H	32_PG13																																1
220	OSS	Basin_4_A(top)	Lake 8	LK8K1B	32_PG13																																1
223	OSS	Basin_4_A(top)	Lake 8	LK8K1E	32_PG13																																1
224	OSS	Basin_4_A(top)	Lake 8	LK8K1F	32_PG13																																1
225	OSS	Basin_4_A(top)	Lake 8	LK8K1H	32_PG13																																1
232	OSS	Basin_4_A(top)	Lake 8	LK8K3A	32_PG13																																1
233	OSS	Basin_4_A(top)	Lake 8	LK8K3C	32_PG13																																1
234	OSS	Basin_4_A(top)	Lake 8	LK8K3D	32_PG13																																1
235	OSS	Basin_4_A(top)	Lake 8	LK8K3E	32_PG13																																1
236	OSS	Basin_4_A(top)	Lake 8	LK8K3F	32_PG13																																1
237	OSS	Basin_4_A(top)	Lake 8	LK8K4A	32_PG13																																1
244	OSS	Basin_4_A(top)	Lake 8	LK8K5B	32_PG13																																1
246	OSS	Basin_4_A(top)	Lake 8	LK8K5G	32_PG13																																1
131	TOP	Basin_3_A(top)	Lake 4	LK4K4A	33_PAO																																	1
45	GOL	Basin_1_B(mid)	Lake 5	LK5K8C	34_PAO																																		1
8	HIN	Basin_1_A(top)	Lake 6	LK6K5G	35_PAO																																			1
199	GRU	Basin_3_B(low)	Lake 2	LK2K6A	36_PAO																																				1
165	TOP	Basin_3_A(top)	Lake 4	LK4K9F	37_PAO																																					1
88	ALT	Basin_2	Lake 1	LK1K2C	38_PAO																																						1
185	GRU	Basin_3_B(low)	Lake 2	LK2K3G	39_PAO																																							1
86	GOS	Basin_1_C(low)	Lake 3	LK3K9E	40_PAO																																								1
54	GOS	Basin_1_C(low)	Lake 3	LK3K2H	41_PAO																																									1
33	GOL	Basin_1_B(mid)	Lake 5	LK5K4D	42_PAO																																										1
37	GOL	Basin_1_B(mid)	Lake 5	LK5K4H	43_PAO																																											1
90	ALT	Basin_2	Lake 1	LK1K6A	44_PG17																																												1
94	ALT	Basin_2	Lake 1	LK1K6F	44_PG17																																												1
255	OSS	Basin_4_A(top)	Lake 8	LK8K7E	44_PG17																																												1
256	OSS	Basin_4_A(top)	Lake 8	LK8K7G	44_PG17																																												1
268	WOR	Basin_4_B(low)	Lake 7	LK7K5B	44_PG17																																												1
270	WOR	Basin_4_B(low)	Lake 7	LK7K5F	44_PG17																																												1
271	WOR	Basin_4_B(low)	Lake 7	LK7K5H	44_PG17																																												1
226	OSS	Basin_4_A(top)	Lake 8	LK8K2A	45_PG17
253	OSS	Basin_4_A(top)	Lake 8	LK8K7A	46_PG17
111	ALT	Basin_2	Lake 1	LK1K9F	47_PG17
169	GRU	Basin_3_B(low)	Lake 2	LK2K1D	47_PG17
171	GRU	Basin_3_B(low)	Lake 2	LK2K1G	47_PG17
183	GRU	Basin_3_B(low)	Lake 2	LK2K3E	48_PG17
176	GRU	Basin_3_B(low)	Lake 2	LK2K2D	49_PG17
42	GOL	Basin_1_B(mid)	Lake 5	LK5K6C	50_PG17
188	GRU	Basin_3_B(low)	Lake 2	LK2K4D	51_PG17
101	ALT	Basin_2	Lake 1	LK1K8B	52_PG17
102	ALT	Basin_2	Lake 1	LK1K8D	52_PG17
103	ALT	Basin_2	Lake 1	LK1K8E	52_PG17
229	OSS	Basin_4_A(top)	Lake 8	LK8K2F	52_PG17
163	TOP	Basin_3_A(top)	Lake 4	LK4K8H	53_PG17
120	TOP	Basin_3_A(top)	Lake 4	LK4K2F	54_PG17
159	TOP	Basin_3_A(top)	Lake 4	LK4K8C	54_PG17
162	TOP	Basin_3_A(top)	Lake 4	LK4K8F	54_PG17
182	GRU	Basin_3_B(low)	Lake 2	LK2K3D	54_PG17
158	TOP	Basin_3_A(top)	Lake 4	LK4K8B	55_PG17
189	GRU	Basin_3_B(low)	Lake 2	LK2K4G	55_PG17
215	GRU	Basin_3_B(low)	Lake 2	LK2K9C	56_PG17
105	ALT	Basin_2	Lake 1	LK1K8G	57_PG17
180	GRU	Basin_3_B(low)	Lake 2	LK2K3B	58_PG17
206	GRU	Basin_3_B(low)	Lake 2	LK2K7C	59_PG17
209	GRU	Basin_3_B(low)	Lake 2	LK2K7F	59_PG17
197	GRU	Basin_3_B(low)	Lake 2	LK2K5G	60_PG17
104	ALT	Basin_2	Lake 1	LK1K8F	61_PG17
108	ALT	Basin_2	Lake 1	LK1K9B	61_PG17
116	TOP	Basin_3_A(top)	Lake 4	LK4K2B	61_PG17
121	TOP	Basin_3_A(top)	Lake 4	LK4K2G	62_PG17
110	ALT	Basin_2	Lake 1	LK1K9D	63_PG17
115	TOP	Basin_3_A(top)	Lake 4	LK4K2A	63_PG17
119	TOP	Basin_3_A(top)	Lake 4	LK4K2E	64_PG17
136	TOP	Basin_3_A(top)	Lake 4	LK4K4G	64_PG17
107	ALT	Basin_2	Lake 1	LK1K9A	65_PG17
170	GRU	Basin_3_B(low)	Lake 2	LK2K1F	65_PG17
172	GRU	Basin_3_B(low)	Lake 2	LK2K1H	65_PG17
265	OSS	Basin_4_A(top)	Lake 8	LK8K9C	66_PG17
96	ALT	Basin_2	Lake 1	LK1K6H	67_PG17
97	ALT	Basin_2	Lake 1	LK1K7B	67_PG17
135	TOP	Basin_3_A(top)	Lake 4	LK4K4E	67_PG17
137	TOP	Basin_3_A(top)	Lake 4	LK4K5A	67_PG17
140	TOP	Basin_3_A(top)	Lake 4	LK4K5D	67_PG17
173	GRU	Basin_3_B(low)	Lake 2	LK2K2A	67_PG17
202	GRU	Basin_3_B(low)	Lake 2	LK2K6F	67_PG17
203	GRU	Basin_3_B(low)	Lake 2	LK2K6G	67_PG17
204	GRU	Basin_3_B(low)	Lake 2	LK2K6H	67_PG17
205	GRU	Basin_3_B(low)	Lake 2	LK2K7B	67_PG17
212	GRU	Basin_3_B(low)	Lake 2	LK2K8E	67_PG17
157	TOP	Basin_3_A(top)	Lake 4	LK4K8A	68_PG17
249	OSS	Basin_4_A(top)	Lake 8	LK8K6C	68_PG17
250	OSS	Basin_4_A(top)	Lake 8	LK8K6D	68_PG17
251	OSS	Basin_4_A(top)	Lake 8	LK8K6G	68_PG17
252	OSS	Basin_4_A(top)	Lake 8	LK8K6H	68_PG17
14	HIN	Basin_1_A(top)	Lake 6	LK6K8A	69_PG17
15	HIN	Basin_1_A(top)	Lake 6	LK6K8E	69_PG17
23	GOL	Basin_1_B(mid)	Lake 5	LK5K1D	70_PG17
24	GOL	Basin_1_B(mid)	Lake 5	LK5K1F	70_PG17
30	GOL	Basin_1_B(mid)	Lake 5	LK5K4A	70_PG17
31	GOL	Basin_1_B(mid)	Lake 5	LK5K4B	70_PG17
34	GOL	Basin_1_B(mid)	Lake 5	LK5K4E	70_PG17
35	GOL	Basin_1_B(mid)	Lake 5	LK5K4F	70_PG17
89	ALT	Basin_2	Lake 1	LK1K5G	70_PG17
100	ALT	Basin_2	Lake 1	LK1K8A	70_PG17
174	GRU	Basin_3_B(low)	Lake 2	LK2K2B	70_PG17
272			STRAINS/HAPLOTYPE			47	1	5	11	10	1	5	2	1	1	2	2	1	11	1	11	4	6	1	9	1	28	1	2	3	1	1	1	1	2	1	14	1	1	1	1	1	1	1	1	1	1	1	7
273
274		Basin_1_A(top)	Lake 6	LK6K1B
275		Basin_1_A(top)	Lake 6	LK6K1C
276		Basin_1_A(top)	Lake 6	LK6K1D
277		Basin_1_A(top)	Lake 6	LK6K1F
278		Basin_1_A(top)	Lake 6	LK6K1G
279		Basin_1_A(top)	Lake 6	LK6K2C
280		Basin_1_A(top)	Lake 6	LK6K3B
281		Basin_1_A(top)	Lake 6	LK6K3C
282		Basin_1_A(top)	Lake 6	LK6K3D
283		Basin_1_A(top)	Lake 6	LK6K3E
284		Basin_1_A(top)	Lake 6	LK6K3G
285		Basin_1_A(top)	Lake 6	LK6K3H
286		Basin_1_A(top)	Lake 6	LK6K5A
287		Basin_1_A(top)	Lake 6	LK6K5E
288		Basin_1_A(top)	Lake 6	LK6K5H
289		Basin_1_A(top)	Lake 6	LK6K7A
290		Basin_1_A(top)	Lake 6	LK6K7B
291		Basin_1_A(top)	Lake 6	LK6K7F
292		Basin_1_A(top)	Lake 6	LK6K7G
293		Basin_1_A(top)	Lake 6	LK6K9C
294		Basin_1_A(top)	Lake 6	LK6K9D
295		Basin_1_A(top)	Lake 6	LK6K9E
296		Basin_1_A(top)	Lake 6	LK6K9G
297		Basin_1_B(mid)	Lake 5	LK5K1A
298		Basin_1_B(mid)	Lake 5	LK5K1C
299		Basin_1_B(mid)	Lake 5	LK5K1E
300		Basin_1_B(mid)	Lake 5	LK5K1G
301		Basin_1_B(mid)	Lake 5	LK5K2D
302		Basin_1_B(mid)	Lake 5	LK5K2E
303		Basin_1_B(mid)	Lake 5	LK5K2G
304		Basin_1_B(mid)	Lake 5	LK5K2H
305		Basin_1_B(mid)	Lake 5	LK5K3A
306		Basin_1_B(mid)	Lake 5	LK5K3B
307		Basin_1_B(mid)	Lake 5	LK5K3C
308		Basin_1_B(mid)	Lake 5	LK5K3D
309		Basin_1_B(mid)	Lake 5	LK5K3E
310		Basin_1_B(mid)	Lake 5	LK5K3F
311		Basin_1_B(mid)	Lake 5	LK5K3G
312		Basin_1_B(mid)	Lake 5	LK5K3H
313		Basin_1_B(mid)	Lake 5	LK5K5D
314		Basin_1_B(mid)	Lake 5	LK5K5F
315		Basin_1_B(mid)	Lake 5	LK5K5H
316		Basin_1_B(mid)	Lake 5	LK5K6E
317		Basin_1_B(mid)	Lake 5	LK5K6F
318		Basin_1_B(mid)	Lake 5	LK5K6H
319		Basin_1_B(mid)	Lake 5	LK5K7B
320		Basin_1_B(mid)	Lake 5	LK5K7D
321		Basin_1_B(mid)	Lake 5	LK5K7E
322		Basin_1_B(mid)	Lake 5	LK5K7F
323		Basin_1_B(mid)	Lake 5	LK5K7G
324		Basin_1_B(mid)	Lake 5	LK5K8A
325		Basin_1_B(mid)	Lake 5	LK5K8B
326		Basin_1_B(mid)	Lake 5	LK5K8E
327		Basin_1_B(mid)	Lake 5	LK5K8G
328		Basin_1_B(mid)	Lake 5	LK5K8H
329		Basin_1_C(low)	Lake 3	LK3K1A
330		Basin_1_C(low)	Lake 3	LK3K1F
331		Basin_1_C(low)	Lake 3	LK3K3A
332		Basin_1_C(low)	Lake 3	LK3K3C
333		Basin_1_C(low)	Lake 3	LK3K3D
334		Basin_1_C(low)	Lake 3	LK3K3H
335		Basin_1_C(low)	Lake 3	LK3K6A
336		Basin_1_C(low)	Lake 3	LK3K6E
337		Basin_1_C(low)	Lake 3	LK3K8B
338		Basin_1_C(low)	Lake 3	LK3K9B
339		Basin_1_C(low)	Lake 3	LK3K9F
340		Basin_1_C(low)	Lake 3	LK3K9G
341		Basin_1_C(low)	Lake 3	LK3K9H
342		Basin_2	Lake 1	LK1K1A
343		Basin_2	Lake 1	LK1K1B
344		Basin_2	Lake 1	LK1K1C
345		Basin_2	Lake 1	LK1K1D
346		Basin_2	Lake 1	LK1K1E
347		Basin_2	Lake 1	LK1K1G
348		Basin_2	Lake 1	LK1K2B
349		Basin_2	Lake 1	LK1K2E
350		Basin_2	Lake 1	LK1K2F
351		Basin_2	Lake 1	LK1K2G
352		Basin_2	Lake 1	LK1K2H
353		Basin_2	Lake 1	LK1K7A
354		Basin_2	Lake 1	LK1K7C
355		Basin_2	Lake 1	LK1K7F
356		Basin_2	Lake 1	LK1K7G
357		Basin_2	Lake 1	LK1K7H
358		Basin_2	Lake 1	LK1K9E
359		Basin_3_A(top)	Lake 4	LK4K4F
360		Basin_3_A(top)	Lake 4	LK4K4H
361		Basin_3_A(top)	Lake 4	LK4K7A
362		Basin_3_A(top)	Lake 4	LK4K7G
363		Basin_3_A(top)	Lake 4	LK4K8G
364		Basin_3_A(top)	Lake 4	LK4K9A
365		Basin_3_A(top)	Lake 4	LK4K9C
366		Basin_3_A(top)	Lake 4	LK4K9E
367		Basin_3_A(top)	Lake 4	LK4P9G
368		Basin_3_A(top)	Lake 4	LK4P9H
369		Basin_3_B(low)	Lake 2	LK2K3A
370		Basin_3_B(low)	Lake 2	LK2K4B
371		Basin_3_B(low)	Lake 2	LK2K4E
372		Basin_3_B(low)	Lake 2	LK2K4F
373		Basin_3_B(low)	Lake 2	LK2K6B
374		Basin_3_B(low)	Lake 2	LK2K7A
375		Basin_3_B(low)	Lake 2	LK2K8A
376		Basin_3_B(low)	Lake 2	LK2K8B
377		Basin_3_B(low)	Lake 2	LK2K8C
378		Basin_3_B(low)	Lake 2	LK2K8D
379		Basin_3_B(low)	Lake 2	LK2K8F
380		Basin_3_B(low)	Lake 2	LK2K8H
381		Basin_3_B(low)	Lake 2	LK2K9E
382		Basin_3_B(low)	Lake 2	LK2K9G
383		Basin_4_A(top)	Lake 8	LK8K2D
384		Basin_4_A(top)	Lake 8	LK8K5E
385		Basin_4_A(top)	Lake 8	LK8K7D
386		Basin_4_A(top)	Lake 8	LK8K9F
387		Basin_4_B(low)	Lake 7	LK7K1A
388		Basin_4_B(low)	Lake 7	LK7K1B
389		Basin_4_B(low)	Lake 7	LK7K1C
390		Basin_4_B(low)	Lake 7	LK7K1D
391		Basin_4_B(low)	Lake 7	LK7K1E
392		Basin_4_B(low)	Lake 7	LK7K1F
393		Basin_4_B(low)	Lake 7	LK7K1G
394		Basin_4_B(low)	Lake 7	LK7K1H
395		Basin_4_B(low)	Lake 7	LK7K2C
396		Basin_4_B(low)	Lake 7	LK7K2D
397		Basin_4_B(low)	Lake 7	LK7K2E
398		Basin_4_B(low)	Lake 7	LK7K3A
399		Basin_4_B(low)	Lake 7	LK7K3B
400		Basin_4_B(low)	Lake 7	LK7K3C
401		Basin_4_B(low)	Lake 7	LK7K3D
402		Basin_4_B(low)	Lake 7	LK7K3E
403		Basin_4_B(low)	Lake 7	LK7K3F
404		Basin_4_B(low)	Lake 7	LK7K3G
405		Basin_4_B(low)	Lake 7	LK7K3H
406		Basin_4_B(low)	Lake 7	LK7K4C
407		Basin_4_B(low)	Lake 7	LK7K4D
408		Basin_4_B(low)	Lake 7	LK7K4F
409		Basin_4_B(low)	Lake 7	LK7K5A
410		Basin_4_B(low)	Lake 7	LK7K6A
411		Basin_4_B(low)	Lake 7	LK7K6B
412		Basin_4_B(low)	Lake 7	LK7K6C
413		Basin_4_B(low)	Lake 7	LK7K6D
414		Basin_4_B(low)	Lake 7	LK7K6E
415		Basin_4_B(low)	Lake 7	LK7K6F
416		Basin_4_B(low)	Lake 7	LK7K6G
417		Basin_4_B(low)	Lake 7	LK7K6H
[truncated: 40 more columns]

## Sheet: Lake_sort_SUMS_column_CA_CB
				Haplotype#		1	2	3	4	5	6	7	8	9	10	11	12	13	14	15	16	17	18	19	20	21	22	23	24	25	26	27	28	29	30	31	32	33	34	35	36	37	38	39	40	41	42	43	44
Original order (CEM)	Lake code	Basin	# Lake	Isolate ID	HT_PG	01_PG02	02_PG02	03_PG02	04_PG02	05_PG02	06_PG02	07_PG02	08_PG01ex	09_PG01	10_PG01	11_PG01	12_PG01	13_PG10	14_PG07	15_PG07	16_PG07	17_PG07	18_PG09	19_PG09	20_PG09	21_PG09	22_PG09	23_PG14ex	24_PG15ex	25_PG13	26_PG13	27_PG13	28_PG13	29_PG13	30_PG13ex	31_PG13ex	32_PG13ex	33_PAOex	34_PAOex	35_PAOex	36_PAOex	37_PAOex	38_PAOex	39_PAOex	40_PAOex	41_PAOex	42_PAOsx	43_PAOex	44_PG17ex
87	ALT	Basin_2	Lake 1	LK1K1F	21_PG09																					1
88	ALT	Basin_2	Lake 1	LK1K2C	38_PAO																																						1
89	ALT	Basin_2	Lake 1	LK1K5G	70_PG17
90	ALT	Basin_2	Lake 1	LK1K6A	44_PG17																																												1
91	ALT	Basin_2	Lake 1	LK1K6C	22_PG09																						1
92	ALT	Basin_2	Lake 1	LK1K6D	22_PG09																						1
93	ALT	Basin_2	Lake 1	LK1K6E	22_PG09																						1
94	ALT	Basin_2	Lake 1	LK1K6F	44_PG17																																												1
95	ALT	Basin_2	Lake 1	LK1K6G	22_PG09																						1
96	ALT	Basin_2	Lake 1	LK1K6H	67_PG17
97	ALT	Basin_2	Lake 1	LK1K7B	67_PG17
98	ALT	Basin_2	Lake 1	LK1K7D	23_PG14																							1
99	ALT	Basin_2	Lake 1	LK1K7E	22_PG09																						1
100	ALT	Basin_2	Lake 1	LK1K8A	70_PG17
101	ALT	Basin_2	Lake 1	LK1K8B	52_PG17
102	ALT	Basin_2	Lake 1	LK1K8D	52_PG17
103	ALT	Basin_2	Lake 1	LK1K8E	52_PG17
104	ALT	Basin_2	Lake 1	LK1K8F	61_PG17
105	ALT	Basin_2	Lake 1	LK1K8G	57_PG17
106	ALT	Basin_2	Lake 1	LK1K8H	22_PG09																						1
107	ALT	Basin_2	Lake 1	LK1K9A	65_PG17
108	ALT	Basin_2	Lake 1	LK1K9B	61_PG17
109	ALT	Basin_2	Lake 1	LK1K9C	22_PG09																						1
110	ALT	Basin_2	Lake 1	LK1K9D	63_PG17
111	ALT	Basin_2	Lake 1	LK1K9F	47_PG17
112	ALT	Basin_2	Lake 1	LK1K9G	22_PG09																						1
166	GRU	Basin_3_B(low)	Lake 2	LK2K1A	10_PG01										1
167	GRU	Basin_3_B(low)	Lake 2	LK2K1B	05_PG02					1
168	GRU	Basin_3_B(low)	Lake 2	LK2K1C	13_PG10													1
169	GRU	Basin_3_B(low)	Lake 2	LK2K1D	47_PG17
170	GRU	Basin_3_B(low)	Lake 2	LK2K1F	65_PG17
171	GRU	Basin_3_B(low)	Lake 2	LK2K1G	47_PG17
172	GRU	Basin_3_B(low)	Lake 2	LK2K1H	65_PG17
173	GRU	Basin_3_B(low)	Lake 2	LK2K2A	67_PG17
174	GRU	Basin_3_B(low)	Lake 2	LK2K2B	70_PG17
175	GRU	Basin_3_B(low)	Lake 2	LK2K2C	07_PG02							1
176	GRU	Basin_3_B(low)	Lake 2	LK2K2D	49_PG17
177	GRU	Basin_3_B(low)	Lake 2	LK2K2F	07_PG02							1
178	GRU	Basin_3_B(low)	Lake 2	LK2K2G	15_PG07															1
179	GRU	Basin_3_B(low)	Lake 2	LK2K2H	07_PG02							1
180	GRU	Basin_3_B(low)	Lake 2	LK2K3B	58_PG17
181	GRU	Basin_3_B(low)	Lake 2	LK2K3C	05_PG02					1
182	GRU	Basin_3_B(low)	Lake 2	LK2K3D	54_PG17
183	GRU	Basin_3_B(low)	Lake 2	LK2K3E	48_PG17
184	GRU	Basin_3_B(low)	Lake 2	LK2K3F	03_PG02			1
185	GRU	Basin_3_B(low)	Lake 2	LK2K3G	39_PAO																																							1
186	GRU	Basin_3_B(low)	Lake 2	LK2K4A	32_PG13																																1
187	GRU	Basin_3_B(low)	Lake 2	LK2K4C	14_PG07														1
188	GRU	Basin_3_B(low)	Lake 2	LK2K4D	51_PG17
189	GRU	Basin_3_B(low)	Lake 2	LK2K4G	55_PG17
190	GRU	Basin_3_B(low)	Lake 2	LK2K4H	32_PG13																																1
191	GRU	Basin_3_B(low)	Lake 2	LK2K5A	17_PG07																	1
192	GRU	Basin_3_B(low)	Lake 2	LK2K5B	17_PG07																	1
193	GRU	Basin_3_B(low)	Lake 2	LK2K5C	16_PG07																1
194	GRU	Basin_3_B(low)	Lake 2	LK2K5D	17_PG07																	1
195	GRU	Basin_3_B(low)	Lake 2	LK2K5E	04_PG02				1
196	GRU	Basin_3_B(low)	Lake 2	LK2K5F	16_PG07																1
197	GRU	Basin_3_B(low)	Lake 2	LK2K5G	60_PG17
198	GRU	Basin_3_B(low)	Lake 2	LK2K5H	17_PG07																	1
199	GRU	Basin_3_B(low)	Lake 2	LK2K6A	36_PAO																																				1
200	GRU	Basin_3_B(low)	Lake 2	LK2K6D	04_PG02				1
201	GRU	Basin_3_B(low)	Lake 2	LK2K6E	14_PG07														1
202	GRU	Basin_3_B(low)	Lake 2	LK2K6F	67_PG17
203	GRU	Basin_3_B(low)	Lake 2	LK2K6G	67_PG17
204	GRU	Basin_3_B(low)	Lake 2	LK2K6H	67_PG17
205	GRU	Basin_3_B(low)	Lake 2	LK2K7B	67_PG17
206	GRU	Basin_3_B(low)	Lake 2	LK2K7C	59_PG17
207	GRU	Basin_3_B(low)	Lake 2	LK2K7D	06_PG02						1
208	GRU	Basin_3_B(low)	Lake 2	LK2K7E	07_PG02							1
209	GRU	Basin_3_B(low)	Lake 2	LK2K7F	59_PG17
210	GRU	Basin_3_B(low)	Lake 2	LK2K7G	05_PG02					1
211	GRU	Basin_3_B(low)	Lake 2	LK2K7H	05_PG02					1
212	GRU	Basin_3_B(low)	Lake 2	LK2K8E	67_PG17
213	GRU	Basin_3_B(low)	Lake 2	LK2K8G	29_PG13																													1
214	GRU	Basin_3_B(low)	Lake 2	LK2K9A	07_PG02							1
215	GRU	Basin_3_B(low)	Lake 2	LK2K9C	56_PG17
216	GRU	Basin_3_B(low)	Lake 2	LK2K9D	03_PG02			1
217	GRU	Basin_3_B(low)	Lake 2	LK2K9F	03_PG02			1
218	GRU	Basin_3_B(low)	Lake 2	LK2K9H	03_PG02			1
46	GOS	Basin_1_C(low)	Lake 3	LK3K1B	01_PG02	1
47	GOS	Basin_1_C(low)	Lake 3	LK3K1C	01_PG02	1
48	GOS	Basin_1_C(low)	Lake 3	LK3K1D	01_PG02	1
49	GOS	Basin_1_C(low)	Lake 3	LK3K1H	01_PG02	1
50	GOS	Basin_1_C(low)	Lake 3	LK3K2B	01_PG02	1
51	GOS	Basin_1_C(low)	Lake 3	LK3K2C	02_PG02		1
52	GOS	Basin_1_C(low)	Lake 3	LK3K2F	01_PG02	1
53	GOS	Basin_1_C(low)	Lake 3	LK3K2G	01_PG02	1
54	GOS	Basin_1_C(low)	Lake 3	LK3K2H	41_PAO																																									1
55	GOS	Basin_1_C(low)	Lake 3	LK3K3B	01_PG02	1
56	GOS	Basin_1_C(low)	Lake 3	LK3K4C	11_PG01											1
57	GOS	Basin_1_C(low)	Lake 3	LK3K4E	01_PG02	1
58	GOS	Basin_1_C(low)	Lake 3	LK3K4G	01_PG02	1
59	GOS	Basin_1_C(low)	Lake 3	LK3K4H	01_PG02	1
60	GOS	Basin_1_C(low)	Lake 3	LK3K5B	01_PG02	1
61	GOS	Basin_1_C(low)	Lake 3	LK3K5C	01_PG02	1
62	GOS	Basin_1_C(low)	Lake 3	LK3K5D	01_PG02	1
63	GOS	Basin_1_C(low)	Lake 3	LK3K5F	01_PG02	1
64	GOS	Basin_1_C(low)	Lake 3	LK3K5G	01_PG02	1
65	GOS	Basin_1_C(low)	Lake 3	LK3K5H	01_PG02	1
66	GOS	Basin_1_C(low)	Lake 3	LK3K6B	01_PG02	1
67	GOS	Basin_1_C(low)	Lake 3	LK3K6C	24_PG15																								1
68	GOS	Basin_1_C(low)	Lake 3	LK3K6D	01_PG02	1
69	GOS	Basin_1_C(low)	Lake 3	LK3K6F	01_PG02	1
70	GOS	Basin_1_C(low)	Lake 3	LK3K6G	04_PG02				1
71	GOS	Basin_1_C(low)	Lake 3	LK3K6H	24_PG15																								1
72	GOS	Basin_1_C(low)	Lake 3	LK3K7B	22_PG09																						1
73	GOS	Basin_1_C(low)	Lake 3	LK3K7C	22_PG09																						1
74	GOS	Basin_1_C(low)	Lake 3	LK3K7D	22_PG09																						1
75	GOS	Basin_1_C(low)	Lake 3	LK3K7E	22_PG09																						1
76	GOS	Basin_1_C(low)	Lake 3	LK3K7F	22_PG09																						1
77	GOS	Basin_1_C(low)	Lake 3	LK3K7G	22_PG09																						1
78	GOS	Basin_1_C(low)	Lake 3	LK3K7H	22_PG09																						1
79	GOS	Basin_1_C(low)	Lake 3	LK3K8A	14_PG07														1
80	GOS	Basin_1_C(low)	Lake 3	LK3K8C	22_PG09																						1
81	GOS	Basin_1_C(low)	Lake 3	LK3K8D	14_PG07														1
82	GOS	Basin_1_C(low)	Lake 3	LK3K8E	22_PG09																						1
83	GOS	Basin_1_C(low)	Lake 3	LK3K8F	22_PG09																						1
84	GOS	Basin_1_C(low)	Lake 3	LK3K8H	22_PG09																						1
85	GOS	Basin_1_C(low)	Lake 3	LK3K9D	22_PG09																						1
86	GOS	Basin_1_C(low)	Lake 3	LK3K9E	40_PAO																																								1
113	TOP	Basin_3_A(top)	Lake 4	LK4K1G	04_PG02				1
114	TOP	Basin_3_A(top)	Lake 4	LK4K1H	14_PG07														1
115	TOP	Basin_3_A(top)	Lake 4	LK4K2A	63_PG17
116	TOP	Basin_3_A(top)	Lake 4	LK4K2B	61_PG17
117	TOP	Basin_3_A(top)	Lake 4	LK4K2C	26_PG13																										1
118	TOP	Basin_3_A(top)	Lake 4	LK4K2D	14_PG07														1
119	TOP	Basin_3_A(top)	Lake 4	LK4K2E	64_PG17
120	TOP	Basin_3_A(top)	Lake 4	LK4K2F	54_PG17
121	TOP	Basin_3_A(top)	Lake 4	LK4K2G	62_PG17
122	TOP	Basin_3_A(top)	Lake 4	LK4K2H	14_PG07														1
123	TOP	Basin_3_A(top)	Lake 4	LK4K3A	20_PG09																				1
124	TOP	Basin_3_A(top)	Lake 4	LK4K3B	20_PG09																				1
125	TOP	Basin_3_A(top)	Lake 4	LK4K3C	20_PG09																				1
126	TOP	Basin_3_A(top)	Lake 4	LK4K3D	20_PG09																				1
127	TOP	Basin_3_A(top)	Lake 4	LK4K3E	20_PG09																				1
128	TOP	Basin_3_A(top)	Lake 4	LK4K3F	20_PG09																				1
129	TOP	Basin_3_A(top)	Lake 4	LK4K3G	20_PG09																				1
130	TOP	Basin_3_A(top)	Lake 4	LK4K3H	20_PG09																				1
131	TOP	Basin_3_A(top)	Lake 4	LK4K4A	33_PAO																																	1
132	TOP	Basin_3_A(top)	Lake 4	LK4K4B	18_PG09																		1
133	TOP	Basin_3_A(top)	Lake 4	LK4K4C	04_PG02				1
134	TOP	Basin_3_A(top)	Lake 4	LK4K4D	20_PG09																				1
135	TOP	Basin_3_A(top)	Lake 4	LK4K4E	67_PG17
136	TOP	Basin_3_A(top)	Lake 4	LK4K4G	64_PG17
137	TOP	Basin_3_A(top)	Lake 4	LK4K5A	67_PG17
138	TOP	Basin_3_A(top)	Lake 4	LK4K5B	16_PG07																1
139	TOP	Basin_3_A(top)	Lake 4	LK4K5C	16_PG07																1
140	TOP	Basin_3_A(top)	Lake 4	LK4K5D	67_PG17
141	TOP	Basin_3_A(top)	Lake 4	LK4K5E	16_PG07																1
142	TOP	Basin_3_A(top)	Lake 4	LK4K5F	16_PG07																1
143	TOP	Basin_3_A(top)	Lake 4	LK4K6A	14_PG07														1
144	TOP	Basin_3_A(top)	Lake 4	LK4K6B	16_PG07																1
145	TOP	Basin_3_A(top)	Lake 4	LK4K6C	11_PG01											1
146	TOP	Basin_3_A(top)	Lake 4	LK4K6D	16_PG07																1
147	TOP	Basin_3_A(top)	Lake 4	LK4K6E	18_PG09																		1
148	TOP	Basin_3_A(top)	Lake 4	LK4K6F	18_PG09																		1
149	TOP	Basin_3_A(top)	Lake 4	LK4K6G	18_PG09																		1
150	TOP	Basin_3_A(top)	Lake 4	LK4K6H	18_PG09																		1
151	TOP	Basin_3_A(top)	Lake 4	LK4K7B	04_PG02				1
152	TOP	Basin_3_A(top)	Lake 4	LK4K7C	04_PG02				1
153	TOP	Basin_3_A(top)	Lake 4	LK4K7D	28_PG13																												1
154	TOP	Basin_3_A(top)	Lake 4	LK4K7E	04_PG02				1
155	TOP	Basin_3_A(top)	Lake 4	LK4K7F	09_PG01									1
156	TOP	Basin_3_A(top)	Lake 4	LK4K7H	12_PG01												1
157	TOP	Basin_3_A(top)	Lake 4	LK4K8A	68_PG17
158	TOP	Basin_3_A(top)	Lake 4	LK4K8B	55_PG17
159	TOP	Basin_3_A(top)	Lake 4	LK4K8C	54_PG17
160	TOP	Basin_3_A(top)	Lake 4	LK4K8D	04_PG02				1
161	TOP	Basin_3_A(top)	Lake 4	LK4K8E	16_PG07																1
162	TOP	Basin_3_A(top)	Lake 4	LK4K8F	54_PG17
163	TOP	Basin_3_A(top)	Lake 4	LK4K8H	53_PG17
164	TOP	Basin_3_A(top)	Lake 4	LK4K9B	04_PG02				1
165	TOP	Basin_3_A(top)	Lake 4	LK4K9F	37_PAO																																					1
22	GOL	Basin_1_B(mid)	Lake 5	LK5K1B	12_PG01												1
23	GOL	Basin_1_B(mid)	Lake 5	LK5K1D	70_PG17
24	GOL	Basin_1_B(mid)	Lake 5	LK5K1F	70_PG17
25	GOL	Basin_1_B(mid)	Lake 5	LK5K1H	22_PG09																						1
26	GOL	Basin_1_B(mid)	Lake 5	LK5K2A	01_PG02	1
27	GOL	Basin_1_B(mid)	Lake 5	LK5K2B	01_PG02	1
28	GOL	Basin_1_B(mid)	Lake 5	LK5K2C	01_PG02	1
29	GOL	Basin_1_B(mid)	Lake 5	LK5K2F	04_PG02				1
30	GOL	Basin_1_B(mid)	Lake 5	LK5K4A	70_PG17
31	GOL	Basin_1_B(mid)	Lake 5	LK5K4B	70_PG17
32	GOL	Basin_1_B(mid)	Lake 5	LK5K4C	01_PG02	1
33	GOL	Basin_1_B(mid)	Lake 5	LK5K4D	42_PAO																																										1
34	GOL	Basin_1_B(mid)	Lake 5	LK5K4E	70_PG17
35	GOL	Basin_1_B(mid)	Lake 5	LK5K4F	70_PG17
36	GOL	Basin_1_B(mid)	Lake 5	LK5K4G	22_PG09																						1
37	GOL	Basin_1_B(mid)	Lake 5	LK5K4H	43_PAO																																											1
38	GOL	Basin_1_B(mid)	Lake 5	LK5K5B	22_PG09																						1
39	GOL	Basin_1_B(mid)	Lake 5	LK5K5E	22_PG09																						1
40	GOL	Basin_1_B(mid)	Lake 5	LK5K5G	22_PG09																						1
41	GOL	Basin_1_B(mid)	Lake 5	LK5K6B	22_PG09																						1
42	GOL	Basin_1_B(mid)	Lake 5	LK5K6C	50_PG17
43	GOL	Basin_1_B(mid)	Lake 5	LK5K6D	22_PG09																						1
44	GOL	Basin_1_B(mid)	Lake 5	LK5K6G	22_PG09																						1
45	GOL	Basin_1_B(mid)	Lake 5	LK5K8C	34_PAO																																		1
1	HIN	Basin_1_A(top)	Lake 6	LK6K4C	01_PG02	1
2	HIN	Basin_1_A(top)	Lake 6	LK6K4D	01_PG02	1
3	HIN	Basin_1_A(top)	Lake 6	LK6K4H	01_PG02	1
4	HIN	Basin_1_A(top)	Lake 6	LK6K5B	01_PG02	1
5	HIN	Basin_1_A(top)	Lake 6	LK6K5C	16_PG07																1
6	HIN	Basin_1_A(top)	Lake 6	LK6K5D	01_PG02	1
7	HIN	Basin_1_A(top)	Lake 6	LK6K5F	16_PG07																1
8	HIN	Basin_1_A(top)	Lake 6	LK6K5G	35_PAO																																			1
9	HIN	Basin_1_A(top)	Lake 6	LK6K6A	01_PG02	1
10	HIN	Basin_1_A(top)	Lake 6	LK6K6C	01_PG02	1
11	HIN	Basin_1_A(top)	Lake 6	LK6K6E	01_PG02	1
12	HIN	Basin_1_A(top)	Lake 6	LK6K6H	01_PG02	1
13	HIN	Basin_1_A(top)	Lake 6	LK6K7D	01_PG02	1
14	HIN	Basin_1_A(top)	Lake 6	LK6K8A	69_PG17
15	HIN	Basin_1_A(top)	Lake 6	LK6K8E	69_PG17
16	HIN	Basin_1_A(top)	Lake 6	LK6K8F	01_PG02	1
17	HIN	Basin_1_A(top)	Lake 6	LK6K8H	01_PG02	1
18	HIN	Basin_1_A(top)	Lake 6	LK6K9A	01_PG02	1
19	HIN	Basin_1_A(top)	Lake 6	LK6K9B	01_PG02	1
20	HIN	Basin_1_A(top)	Lake 6	LK6K9F	01_PG02	1
21	HIN	Basin_1_A(top)	Lake 6	LK6K9H	01_PG02	1
268	WOR	Basin_4_B(low)	Lake 7	LK7K5B	44_PG17																																												1
269	WOR	Basin_4_B(low)	Lake 7	LK7K5C	14_PG07														1
270	WOR	Basin_4_B(low)	Lake 7	LK7K5F	44_PG17																																												1
271	WOR	Basin_4_B(low)	Lake 7	LK7K5H	44_PG17																																												1
219	OSS	Basin_4_A(top)	Lake 8	LK8K1A	01_PG02	1
220	OSS	Basin_4_A(top)	Lake 8	LK8K1B	32_PG13																																1
221	OSS	Basin_4_A(top)	Lake 8	LK8K1C	30_PG13																														1
222	OSS	Basin_4_A(top)	Lake 8	LK8K1D	18_PG09																		1
223	OSS	Basin_4_A(top)	Lake 8	LK8K1E	32_PG13																																1
224	OSS	Basin_4_A(top)	Lake 8	LK8K1F	32_PG13																																1
225	OSS	Basin_4_A(top)	Lake 8	LK8K1H	32_PG13																																1
226	OSS	Basin_4_A(top)	Lake 8	LK8K2A	45_PG17
227	OSS	Basin_4_A(top)	Lake 8	LK8K2C	05_PG02					1
228	OSS	Basin_4_A(top)	Lake 8	LK8K2E	30_PG13																														1
229	OSS	Basin_4_A(top)	Lake 8	LK8K2F	52_PG17
230	OSS	Basin_4_A(top)	Lake 8	LK8K2G	03_PG02			1
231	OSS	Basin_4_A(top)	Lake 8	LK8K2H	31_PG13																															1
232	OSS	Basin_4_A(top)	Lake 8	LK8K3A	32_PG13																																1
233	OSS	Basin_4_A(top)	Lake 8	LK8K3C	32_PG13																																1
234	OSS	Basin_4_A(top)	Lake 8	LK8K3D	32_PG13																																1
235	OSS	Basin_4_A(top)	Lake 8	LK8K3E	32_PG13																																1
236	OSS	Basin_4_A(top)	Lake 8	LK8K3F	32_PG13																																1
237	OSS	Basin_4_A(top)	Lake 8	LK8K4A	32_PG13																																1
238	OSS	Basin_4_A(top)	Lake 8	LK8K4B	01_PG02	1
239	OSS	Basin_4_A(top)	Lake 8	LK8K4C	01_PG02	1
240	OSS	Basin_4_A(top)	Lake 8	LK8K4E	01_PG02	1
241	OSS	Basin_4_A(top)	Lake 8	LK8K4F	01_PG02	1
242	OSS	Basin_4_A(top)	Lake 8	LK8K4H	01_PG02	1
243	OSS	Basin_4_A(top)	Lake 8	LK8K5A	01_PG02	1
244	OSS	Basin_4_A(top)	Lake 8	LK8K5B	32_PG13																																1
245	OSS	Basin_4_A(top)	Lake 8	LK8K5D	25_PG13																									1
246	OSS	Basin_4_A(top)	Lake 8	LK8K5G	32_PG13																																1
247	OSS	Basin_4_A(top)	Lake 8	LK8K5H	25_PG13																									1
248	OSS	Basin_4_A(top)	Lake 8	LK8K6B	27_PG13																											1
249	OSS	Basin_4_A(top)	Lake 8	LK8K6C	68_PG17
250	OSS	Basin_4_A(top)	Lake 8	LK8K6D	68_PG17
251	OSS	Basin_4_A(top)	Lake 8	LK8K6G	68_PG17
252	OSS	Basin_4_A(top)	Lake 8	LK8K6H	68_PG17
253	OSS	Basin_4_A(top)	Lake 8	LK8K7A	46_PG17
254	OSS	Basin_4_A(top)	Lake 8	LK8K7C	05_PG02					1
255	OSS	Basin_4_A(top)	Lake 8	LK8K7E	44_PG17																																												1
256	OSS	Basin_4_A(top)	Lake 8	LK8K7G	44_PG17																																												1
257	OSS	Basin_4_A(top)	Lake 8	LK8K7H	05_PG02					1
258	OSS	Basin_4_A(top)	Lake 8	LK8K8A	25_PG13																									1
259	OSS	Basin_4_A(top)	Lake 8	LK8K8B	05_PG02					1
260	OSS	Basin_4_A(top)	Lake 8	LK8K8C	14_PG07														1
261	OSS	Basin_4_A(top)	Lake 8	LK8K8D	14_PG07														1
262	OSS	Basin_4_A(top)	Lake 8	LK8K8E	05_PG02					1
263	OSS	Basin_4_A(top)	Lake 8	LK8K8F	05_PG02					1
264	OSS	Basin_4_A(top)	Lake 8	LK8K8H	19_PG09																			1
265	OSS	Basin_4_A(top)	Lake 8	LK8K9C	66_PG17
266	OSS	Basin_4_A(top)	Lake 8	LK8K9D	08_PG01								1
267	OSS	Basin_4_A(top)	Lake 8	LK8K9H	08_PG01								1
272			STRAINS/HAPLOTYPE			47	1	5	11	10	1	5	2	1	1	2	2	1	11	1	11	4	6	1	9	1	28	1	2	3	1	1	1	1	2	1	14	1	1	1	1	1	1	1	1	1	1	1	7
273
274		Basin_1_A(top)	Lake 6	LK6K1B
275		Basin_1_A(top)	Lake 6	LK6K1C
276		Basin_1_A(top)	Lake 6	LK6K1D
277		Basin_1_A(top)	Lake 6	LK6K1F
278		Basin_1_A(top)	Lake 6	LK6K1G
279		Basin_1_A(top)	Lake 6	LK6K2C
280		Basin_1_A(top)	Lake 6	LK6K3B
281		Basin_1_A(top)	Lake 6	LK6K3C
282		Basin_1_A(top)	Lake 6	LK6K3D
283		Basin_1_A(top)	Lake 6	LK6K3E
284		Basin_1_A(top)	Lake 6	LK6K3G
285		Basin_1_A(top)	Lake 6	LK6K3H
286		Basin_1_A(top)	Lake 6	LK6K5A
287		Basin_1_A(top)	Lake 6	LK6K5E
288		Basin_1_A(top)	Lake 6	LK6K5H
289		Basin_1_A(top)	Lake 6	LK6K7A
290		Basin_1_A(top)	Lake 6	LK6K7B
291		Basin_1_A(top)	Lake 6	LK6K7F
292		Basin_1_A(top)	Lake 6	LK6K7G
293		Basin_1_A(top)	Lake 6	LK6K9C
294		Basin_1_A(top)	Lake 6	LK6K9D
295		Basin_1_A(top)	Lake 6	LK6K9E
296		Basin_1_A(top)	Lake 6	LK6K9G
297		Basin_1_B(mid)	Lake 5	LK5K1A
298		Basin_1_B(mid)	Lake 5	LK5K1C
299		Basin_1_B(mid)	Lake 5	LK5K1E
300		Basin_1_B(mid)	Lake 5	LK5K1G
301		Basin_1_B(mid)	Lake 5	LK5K2D
302		Basin_1_B(mid)	Lake 5	LK5K2E
303		Basin_1_B(mid)	Lake 5	LK5K2G
304		Basin_1_B(mid)	Lake 5	LK5K2H
305		Basin_1_B(mid)	Lake 5	LK5K3A
306		Basin_1_B(mid)	Lake 5	LK5K3B
307		Basin_1_B(mid)	Lake 5	LK5K3C
308		Basin_1_B(mid)	Lake 5	LK5K3D
309		Basin_1_B(mid)	Lake 5	LK5K3E
310		Basin_1_B(mid)	Lake 5	LK5K3F
311		Basin_1_B(mid)	Lake 5	LK5K3G
312		Basin_1_B(mid)	Lake 5	LK5K3H
313		Basin_1_B(mid)	Lake 5	LK5K5D
314		Basin_1_B(mid)	Lake 5	LK5K5F
315		Basin_1_B(mid)	Lake 5	LK5K5H
316		Basin_1_B(mid)	Lake 5	LK5K6E
317		Basin_1_B(mid)	Lake 5	LK5K6F
318		Basin_1_B(mid)	Lake 5	LK5K6H
319		Basin_1_B(mid)	Lake 5	LK5K7B
320		Basin_1_B(mid)	Lake 5	LK5K7D
321		Basin_1_B(mid)	Lake 5	LK5K7E
322		Basin_1_B(mid)	Lake 5	LK5K7F
323		Basin_1_B(mid)	Lake 5	LK5K7G
324		Basin_1_B(mid)	Lake 5	LK5K8A
325		Basin_1_B(mid)	Lake 5	LK5K8B
326		Basin_1_B(mid)	Lake 5	LK5K8E
327		Basin_1_B(mid)	Lake 5	LK5K8G
328		Basin_1_B(mid)	Lake 5	LK5K8H
329		Basin_1_C(low)	Lake 3	LK3K1A
330		Basin_1_C(low)	Lake 3	LK3K1F
331		Basin_1_C(low)	Lake 3	LK3K3A
332		Basin_1_C(low)	Lake 3	LK3K3C
333		Basin_1_C(low)	Lake 3	LK3K3D
334		Basin_1_C(low)	Lake 3	LK3K3H
335		Basin_1_C(low)	Lake 3	LK3K6A
336		Basin_1_C(low)	Lake 3	LK3K6E
337		Basin_1_C(low)	Lake 3	LK3K8B
338		Basin_1_C(low)	Lake 3	LK3K9B
339		Basin_1_C(low)	Lake 3	LK3K9F
340		Basin_1_C(low)	Lake 3	LK3K9G
341		Basin_1_C(low)	Lake 3	LK3K9H
342		Basin_2	Lake 1	LK1K1A
343		Basin_2	Lake 1	LK1K1B
344		Basin_2	Lake 1	LK1K1C
345		Basin_2	Lake 1	LK1K1D
346		Basin_2	Lake 1	LK1K1E
347		Basin_2	Lake 1	LK1K1G
348		Basin_2	Lake 1	LK1K2B
349		Basin_2	Lake 1	LK1K2E
350		Basin_2	Lake 1	LK1K2F
351		Basin_2	Lake 1	LK1K2G
352		Basin_2	Lake 1	LK1K2H
353		Basin_2	Lake 1	LK1K7A
354		Basin_2	Lake 1	LK1K7C
355		Basin_2	Lake 1	LK1K7F
356		Basin_2	Lake 1	LK1K7G
357		Basin_2	Lake 1	LK1K7H
358		Basin_2	Lake 1	LK1K9E
359		Basin_3_A(top)	Lake 4	LK4K4F
360		Basin_3_A(top)	Lake 4	LK4K4H
361		Basin_3_A(top)	Lake 4	LK4K7A
362		Basin_3_A(top)	Lake 4	LK4K7G
363		Basin_3_A(top)	Lake 4	LK4K8G
364		Basin_3_A(top)	Lake 4	LK4K9A
365		Basin_3_A(top)	Lake 4	LK4K9C
366		Basin_3_A(top)	Lake 4	LK4K9E
367		Basin_3_A(top)	Lake 4	LK4P9G
368		Basin_3_A(top)	Lake 4	LK4P9H
369		Basin_3_B(low)	Lake 2	LK2K3A
370		Basin_3_B(low)	Lake 2	LK2K4B
371		Basin_3_B(low)	Lake 2	LK2K4E
372		Basin_3_B(low)	Lake 2	LK2K4F
373		Basin_3_B(low)	Lake 2	LK2K6B
374		Basin_3_B(low)	Lake 2	LK2K7A
375		Basin_3_B(low)	Lake 2	LK2K8A
376		Basin_3_B(low)	Lake 2	LK2K8B
377		Basin_3_B(low)	Lake 2	LK2K8C
378		Basin_3_B(low)	Lake 2	LK2K8D
379		Basin_3_B(low)	Lake 2	LK2K8F
380		Basin_3_B(low)	Lake 2	LK2K8H
381		Basin_3_B(low)	Lake 2	LK2K9E
382		Basin_3_B(low)	Lake 2	LK2K9G
383		Basin_4_A(top)	Lake 8	LK8K2D
384		Basin_4_A(top)	Lake 8	LK8K5E
385		Basin_4_A(top)	Lake 8	LK8K7D
386		Basin_4_A(top)	Lake 8	LK8K9F
387		Basin_4_B(low)	Lake 7	LK7K1A
388		Basin_4_B(low)	Lake 7	LK7K1B
389		Basin_4_B(low)	Lake 7	LK7K1C
390		Basin_4_B(low)	Lake 7	LK7K1D
391		Basin_4_B(low)	Lake 7	LK7K1E
392		Basin_4_B(low)	Lake 7	LK7K1F
393		Basin_4_B(low)	Lake 7	LK7K1G
394		Basin_4_B(low)	Lake 7	LK7K1H
395		Basin_4_B(low)	Lake 7	LK7K2C
396		Basin_4_B(low)	Lake 7	LK7K2D
397		Basin_4_B(low)	Lake 7	LK7K2E
398		Basin_4_B(low)	Lake 7	LK7K3A
399		Basin_4_B(low)	Lake 7	LK7K3B
400		Basin_4_B(low)	Lake 7	LK7K3C
401		Basin_4_B(low)	Lake 7	LK7K3D
402		Basin_4_B(low)	Lake 7	LK7K3E
403		Basin_4_B(low)	Lake 7	LK7K3F
404		Basin_4_B(low)	Lake 7	LK7K3G
405		Basin_4_B(low)	Lake 7	LK7K3H
406		Basin_4_B(low)	Lake 7	LK7K4C
407		Basin_4_B(low)	Lake 7	LK7K4D
408		Basin_4_B(low)	Lake 7	LK7K4F
409		Basin_4_B(low)	Lake 7	LK7K5A
410		Basin_4_B(low)	Lake 7	LK7K6A
411		Basin_4_B(low)	Lake 7	LK7K6B
412		Basin_4_B(low)	Lake 7	LK7K6C
413		Basin_4_B(low)	Lake 7	LK7K6D
414		Basin_4_B(low)	Lake 7	LK7K6E
415		Basin_4_B(low)	Lake 7	LK7K6F
416		Basin_4_B(low)	Lake 7	LK7K6G
417		Basin_4_B(low)	Lake 7	LK7K6H
[truncated: 42 more columns]

## Sheet: Lake_sort_SUM_EACH_HT01_to_HT32
				Haplotype#		1	2	3	4	5	6	7	8	9	10	11	12	13	14	15	16	17	18	19	20	21	22	23	24	25	26	27	28	29	30	31	32	33	34	35	36	37	38	39	40	41	42	43	44
Original order (CEM)	Lake code	Basin	# Lake	Isolate ID	HT_PG	01_PG02	02_PG02	03_PG02	04_PG02	05_PG02	06_PG02	07_PG02	08_PG01ex	09_PG01	10_PG01	11_PG01	12_PG01	13_PG10	14_PG07	15_PG07	16_PG07	17_PG07	18_PG09	19_PG09	20_PG09	21_PG09	22_PG09	23_PG14ex	24_PG15ex	25_PG13	26_PG13	27_PG13	28_PG13	29_PG13	30_PG13ex	31_PG13ex	32_PG13ex	33_PAOex	34_PAOex	35_PAOex	36_PAOex	37_PAOex	38_PAOex	39_PAOex	40_PAOex	41_PAOex	42_PAOsx	43_PAOex	44_PG17ex
87	ALT	Basin_2	Lake 1	LK1K1F	21_PG09																					1
88	ALT	Basin_2	Lake 1	LK1K2C	38_PAO																																						1
89	ALT	Basin_2	Lake 1	LK1K5G	70_PG17
90	ALT	Basin_2	Lake 1	LK1K6A	44_PG17																																												1
91	ALT	Basin_2	Lake 1	LK1K6C	22_PG09																						1
92	ALT	Basin_2	Lake 1	LK1K6D	22_PG09																						1
93	ALT	Basin_2	Lake 1	LK1K6E	22_PG09																						1
94	ALT	Basin_2	Lake 1	LK1K6F	44_PG17																																												1
95	ALT	Basin_2	Lake 1	LK1K6G	22_PG09																						1
96	ALT	Basin_2	Lake 1	LK1K6H	67_PG17
97	ALT	Basin_2	Lake 1	LK1K7B	67_PG17
98	ALT	Basin_2	Lake 1	LK1K7D	23_PG14																							1
99	ALT	Basin_2	Lake 1	LK1K7E	22_PG09																						1
100	ALT	Basin_2	Lake 1	LK1K8A	70_PG17
101	ALT	Basin_2	Lake 1	LK1K8B	52_PG17
102	ALT	Basin_2	Lake 1	LK1K8D	52_PG17
103	ALT	Basin_2	Lake 1	LK1K8E	52_PG17
104	ALT	Basin_2	Lake 1	LK1K8F	61_PG17
105	ALT	Basin_2	Lake 1	LK1K8G	57_PG17
106	ALT	Basin_2	Lake 1	LK1K8H	22_PG09																						1
107	ALT	Basin_2	Lake 1	LK1K9A	65_PG17
108	ALT	Basin_2	Lake 1	LK1K9B	61_PG17
109	ALT	Basin_2	Lake 1	LK1K9C	22_PG09																						1
110	ALT	Basin_2	Lake 1	LK1K9D	63_PG17
111	ALT	Basin_2	Lake 1	LK1K9F	47_PG17
112	ALT	Basin_2	Lake 1	LK1K9G	22_PG09																						1
						0	0	0	0	0	0	0	0	0	0	0	0	0	0	0	0	0	0	0	0	1	8	1	0	0	0	0	0	0	0	0	0
166	GRU	Basin_3_B(low)	Lake 2	LK2K1A	10_PG01										1
167	GRU	Basin_3_B(low)	Lake 2	LK2K1B	05_PG02					1
168	GRU	Basin_3_B(low)	Lake 2	LK2K1C	13_PG10													1
169	GRU	Basin_3_B(low)	Lake 2	LK2K1D	47_PG17
170	GRU	Basin_3_B(low)	Lake 2	LK2K1F	65_PG17
171	GRU	Basin_3_B(low)	Lake 2	LK2K1G	47_PG17
172	GRU	Basin_3_B(low)	Lake 2	LK2K1H	65_PG17
173	GRU	Basin_3_B(low)	Lake 2	LK2K2A	67_PG17
174	GRU	Basin_3_B(low)	Lake 2	LK2K2B	70_PG17
175	GRU	Basin_3_B(low)	Lake 2	LK2K2C	07_PG02							1
176	GRU	Basin_3_B(low)	Lake 2	LK2K2D	49_PG17
177	GRU	Basin_3_B(low)	Lake 2	LK2K2F	07_PG02							1
178	GRU	Basin_3_B(low)	Lake 2	LK2K2G	15_PG07															1
179	GRU	Basin_3_B(low)	Lake 2	LK2K2H	07_PG02							1
180	GRU	Basin_3_B(low)	Lake 2	LK2K3B	58_PG17
181	GRU	Basin_3_B(low)	Lake 2	LK2K3C	05_PG02					1
182	GRU	Basin_3_B(low)	Lake 2	LK2K3D	54_PG17
183	GRU	Basin_3_B(low)	Lake 2	LK2K3E	48_PG17
184	GRU	Basin_3_B(low)	Lake 2	LK2K3F	03_PG02			1
185	GRU	Basin_3_B(low)	Lake 2	LK2K3G	39_PAO																																							1
186	GRU	Basin_3_B(low)	Lake 2	LK2K4A	32_PG13																																1
187	GRU	Basin_3_B(low)	Lake 2	LK2K4C	14_PG07														1
188	GRU	Basin_3_B(low)	Lake 2	LK2K4D	51_PG17
189	GRU	Basin_3_B(low)	Lake 2	LK2K4G	55_PG17
190	GRU	Basin_3_B(low)	Lake 2	LK2K4H	32_PG13																																1
191	GRU	Basin_3_B(low)	Lake 2	LK2K5A	17_PG07																	1
192	GRU	Basin_3_B(low)	Lake 2	LK2K5B	17_PG07																	1
193	GRU	Basin_3_B(low)	Lake 2	LK2K5C	16_PG07																1
194	GRU	Basin_3_B(low)	Lake 2	LK2K5D	17_PG07																	1
195	GRU	Basin_3_B(low)	Lake 2	LK2K5E	04_PG02				1
196	GRU	Basin_3_B(low)	Lake 2	LK2K5F	16_PG07																1
197	GRU	Basin_3_B(low)	Lake 2	LK2K5G	60_PG17
198	GRU	Basin_3_B(low)	Lake 2	LK2K5H	17_PG07																	1
199	GRU	Basin_3_B(low)	Lake 2	LK2K6A	36_PAO																																				1
200	GRU	Basin_3_B(low)	Lake 2	LK2K6D	04_PG02				1
201	GRU	Basin_3_B(low)	Lake 2	LK2K6E	14_PG07														1
202	GRU	Basin_3_B(low)	Lake 2	LK2K6F	67_PG17
203	GRU	Basin_3_B(low)	Lake 2	LK2K6G	67_PG17
204	GRU	Basin_3_B(low)	Lake 2	LK2K6H	67_PG17
205	GRU	Basin_3_B(low)	Lake 2	LK2K7B	67_PG17
206	GRU	Basin_3_B(low)	Lake 2	LK2K7C	59_PG17
207	GRU	Basin_3_B(low)	Lake 2	LK2K7D	06_PG02						1
208	GRU	Basin_3_B(low)	Lake 2	LK2K7E	07_PG02							1
209	GRU	Basin_3_B(low)	Lake 2	LK2K7F	59_PG17
210	GRU	Basin_3_B(low)	Lake 2	LK2K7G	05_PG02					1
211	GRU	Basin_3_B(low)	Lake 2	LK2K7H	05_PG02					1
212	GRU	Basin_3_B(low)	Lake 2	LK2K8E	67_PG17
213	GRU	Basin_3_B(low)	Lake 2	LK2K8G	29_PG13																													1
214	GRU	Basin_3_B(low)	Lake 2	LK2K9A	07_PG02							1
215	GRU	Basin_3_B(low)	Lake 2	LK2K9C	56_PG17
216	GRU	Basin_3_B(low)	Lake 2	LK2K9D	03_PG02			1
217	GRU	Basin_3_B(low)	Lake 2	LK2K9F	03_PG02			1
218	GRU	Basin_3_B(low)	Lake 2	LK2K9H	03_PG02			1
						0	0	4	2	4	1	5	0	0	1	0	0	1	2	1	2	4	0	0	0	0	0	0	0	0	0	0	0	1	0	0	2
46	GOS	Basin_1_C(low)	Lake 3	LK3K1B	01_PG02	1
47	GOS	Basin_1_C(low)	Lake 3	LK3K1C	01_PG02	1
48	GOS	Basin_1_C(low)	Lake 3	LK3K1D	01_PG02	1
49	GOS	Basin_1_C(low)	Lake 3	LK3K1H	01_PG02	1
50	GOS	Basin_1_C(low)	Lake 3	LK3K2B	01_PG02	1
51	GOS	Basin_1_C(low)	Lake 3	LK3K2C	02_PG02		1
52	GOS	Basin_1_C(low)	Lake 3	LK3K2F	01_PG02	1
53	GOS	Basin_1_C(low)	Lake 3	LK3K2G	01_PG02	1
54	GOS	Basin_1_C(low)	Lake 3	LK3K2H	41_PAO																																									1
55	GOS	Basin_1_C(low)	Lake 3	LK3K3B	01_PG02	1
56	GOS	Basin_1_C(low)	Lake 3	LK3K4C	11_PG01											1
57	GOS	Basin_1_C(low)	Lake 3	LK3K4E	01_PG02	1
58	GOS	Basin_1_C(low)	Lake 3	LK3K4G	01_PG02	1
59	GOS	Basin_1_C(low)	Lake 3	LK3K4H	01_PG02	1
60	GOS	Basin_1_C(low)	Lake 3	LK3K5B	01_PG02	1
61	GOS	Basin_1_C(low)	Lake 3	LK3K5C	01_PG02	1
62	GOS	Basin_1_C(low)	Lake 3	LK3K5D	01_PG02	1
63	GOS	Basin_1_C(low)	Lake 3	LK3K5F	01_PG02	1
64	GOS	Basin_1_C(low)	Lake 3	LK3K5G	01_PG02	1
65	GOS	Basin_1_C(low)	Lake 3	LK3K5H	01_PG02	1
66	GOS	Basin_1_C(low)	Lake 3	LK3K6B	01_PG02	1
67	GOS	Basin_1_C(low)	Lake 3	LK3K6C	24_PG15																								1
68	GOS	Basin_1_C(low)	Lake 3	LK3K6D	01_PG02	1
69	GOS	Basin_1_C(low)	Lake 3	LK3K6F	01_PG02	1
70	GOS	Basin_1_C(low)	Lake 3	LK3K6G	04_PG02				1
71	GOS	Basin_1_C(low)	Lake 3	LK3K6H	24_PG15																								1
72	GOS	Basin_1_C(low)	Lake 3	LK3K7B	22_PG09																						1
73	GOS	Basin_1_C(low)	Lake 3	LK3K7C	22_PG09																						1
74	GOS	Basin_1_C(low)	Lake 3	LK3K7D	22_PG09																						1
75	GOS	Basin_1_C(low)	Lake 3	LK3K7E	22_PG09																						1
76	GOS	Basin_1_C(low)	Lake 3	LK3K7F	22_PG09																						1
77	GOS	Basin_1_C(low)	Lake 3	LK3K7G	22_PG09																						1
78	GOS	Basin_1_C(low)	Lake 3	LK3K7H	22_PG09																						1
79	GOS	Basin_1_C(low)	Lake 3	LK3K8A	14_PG07														1
80	GOS	Basin_1_C(low)	Lake 3	LK3K8C	22_PG09																						1
81	GOS	Basin_1_C(low)	Lake 3	LK3K8D	14_PG07														1
82	GOS	Basin_1_C(low)	Lake 3	LK3K8E	22_PG09																						1
83	GOS	Basin_1_C(low)	Lake 3	LK3K8F	22_PG09																						1
84	GOS	Basin_1_C(low)	Lake 3	LK3K8H	22_PG09																						1
85	GOS	Basin_1_C(low)	Lake 3	LK3K9D	22_PG09																						1
86	GOS	Basin_1_C(low)	Lake 3	LK3K9E	40_PAO																																								1
						20	1	0	1	0	0	0	0	0	0	1	0	0	2	0	0	0	0	0	0	0	12	0	2	0	0	0	0	0	0	0	0
113	TOP	Basin_3_A(top)	Lake 4	LK4K1G	04_PG02				1
114	TOP	Basin_3_A(top)	Lake 4	LK4K1H	14_PG07														1
115	TOP	Basin_3_A(top)	Lake 4	LK4K2A	63_PG17
116	TOP	Basin_3_A(top)	Lake 4	LK4K2B	61_PG17
117	TOP	Basin_3_A(top)	Lake 4	LK4K2C	26_PG13																										1
118	TOP	Basin_3_A(top)	Lake 4	LK4K2D	14_PG07														1
119	TOP	Basin_3_A(top)	Lake 4	LK4K2E	64_PG17
120	TOP	Basin_3_A(top)	Lake 4	LK4K2F	54_PG17
121	TOP	Basin_3_A(top)	Lake 4	LK4K2G	62_PG17
122	TOP	Basin_3_A(top)	Lake 4	LK4K2H	14_PG07														1
123	TOP	Basin_3_A(top)	Lake 4	LK4K3A	20_PG09																				1
124	TOP	Basin_3_A(top)	Lake 4	LK4K3B	20_PG09																				1
125	TOP	Basin_3_A(top)	Lake 4	LK4K3C	20_PG09																				1
126	TOP	Basin_3_A(top)	Lake 4	LK4K3D	20_PG09																				1
127	TOP	Basin_3_A(top)	Lake 4	LK4K3E	20_PG09																				1
128	TOP	Basin_3_A(top)	Lake 4	LK4K3F	20_PG09																				1
129	TOP	Basin_3_A(top)	Lake 4	LK4K3G	20_PG09																				1
130	TOP	Basin_3_A(top)	Lake 4	LK4K3H	20_PG09																				1
131	TOP	Basin_3_A(top)	Lake 4	LK4K4A	33_PAO																																	1
132	TOP	Basin_3_A(top)	Lake 4	LK4K4B	18_PG09																		1
133	TOP	Basin_3_A(top)	Lake 4	LK4K4C	04_PG02				1
134	TOP	Basin_3_A(top)	Lake 4	LK4K4D	20_PG09																				1
135	TOP	Basin_3_A(top)	Lake 4	LK4K4E	67_PG17
136	TOP	Basin_3_A(top)	Lake 4	LK4K4G	64_PG17
137	TOP	Basin_3_A(top)	Lake 4	LK4K5A	67_PG17
138	TOP	Basin_3_A(top)	Lake 4	LK4K5B	16_PG07																1
139	TOP	Basin_3_A(top)	Lake 4	LK4K5C	16_PG07																1
140	TOP	Basin_3_A(top)	Lake 4	LK4K5D	67_PG17
141	TOP	Basin_3_A(top)	Lake 4	LK4K5E	16_PG07																1
142	TOP	Basin_3_A(top)	Lake 4	LK4K5F	16_PG07																1
143	TOP	Basin_3_A(top)	Lake 4	LK4K6A	14_PG07														1
144	TOP	Basin_3_A(top)	Lake 4	LK4K6B	16_PG07																1
145	TOP	Basin_3_A(top)	Lake 4	LK4K6C	11_PG01											1
146	TOP	Basin_3_A(top)	Lake 4	LK4K6D	16_PG07																1
147	TOP	Basin_3_A(top)	Lake 4	LK4K6E	18_PG09																		1
148	TOP	Basin_3_A(top)	Lake 4	LK4K6F	18_PG09																		1
149	TOP	Basin_3_A(top)	Lake 4	LK4K6G	18_PG09																		1
150	TOP	Basin_3_A(top)	Lake 4	LK4K6H	18_PG09																		1
151	TOP	Basin_3_A(top)	Lake 4	LK4K7B	04_PG02				1
152	TOP	Basin_3_A(top)	Lake 4	LK4K7C	04_PG02				1
153	TOP	Basin_3_A(top)	Lake 4	LK4K7D	28_PG13																												1
154	TOP	Basin_3_A(top)	Lake 4	LK4K7E	04_PG02				1
155	TOP	Basin_3_A(top)	Lake 4	LK4K7F	09_PG01									1
156	TOP	Basin_3_A(top)	Lake 4	LK4K7H	12_PG01												1
157	TOP	Basin_3_A(top)	Lake 4	LK4K8A	68_PG17
158	TOP	Basin_3_A(top)	Lake 4	LK4K8B	55_PG17
159	TOP	Basin_3_A(top)	Lake 4	LK4K8C	54_PG17
160	TOP	Basin_3_A(top)	Lake 4	LK4K8D	04_PG02				1
161	TOP	Basin_3_A(top)	Lake 4	LK4K8E	16_PG07																1
162	TOP	Basin_3_A(top)	Lake 4	LK4K8F	54_PG17
163	TOP	Basin_3_A(top)	Lake 4	LK4K8H	53_PG17
164	TOP	Basin_3_A(top)	Lake 4	LK4K9B	04_PG02				1
165	TOP	Basin_3_A(top)	Lake 4	LK4K9F	37_PAO																																					1
						0	0	0	7	0	0	0	0	1	0	1	1	0	4	0	7	0	5	0	9	0	0	0	0	0	1	0	1	0	0	0	0
22	GOL	Basin_1_B(mid)	Lake 5	LK5K1B	12_PG01												1
23	GOL	Basin_1_B(mid)	Lake 5	LK5K1D	70_PG17
24	GOL	Basin_1_B(mid)	Lake 5	LK5K1F	70_PG17
25	GOL	Basin_1_B(mid)	Lake 5	LK5K1H	22_PG09																						1
26	GOL	Basin_1_B(mid)	Lake 5	LK5K2A	01_PG02	1
27	GOL	Basin_1_B(mid)	Lake 5	LK5K2B	01_PG02	1
28	GOL	Basin_1_B(mid)	Lake 5	LK5K2C	01_PG02	1
29	GOL	Basin_1_B(mid)	Lake 5	LK5K2F	04_PG02				1
30	GOL	Basin_1_B(mid)	Lake 5	LK5K4A	70_PG17
31	GOL	Basin_1_B(mid)	Lake 5	LK5K4B	70_PG17
32	GOL	Basin_1_B(mid)	Lake 5	LK5K4C	01_PG02	1
33	GOL	Basin_1_B(mid)	Lake 5	LK5K4D	42_PAO																																										1
34	GOL	Basin_1_B(mid)	Lake 5	LK5K4E	70_PG17
35	GOL	Basin_1_B(mid)	Lake 5	LK5K4F	70_PG17
36	GOL	Basin_1_B(mid)	Lake 5	LK5K4G	22_PG09																						1
37	GOL	Basin_1_B(mid)	Lake 5	LK5K4H	43_PAO																																											1
38	GOL	Basin_1_B(mid)	Lake 5	LK5K5B	22_PG09																						1
39	GOL	Basin_1_B(mid)	Lake 5	LK5K5E	22_PG09																						1
40	GOL	Basin_1_B(mid)	Lake 5	LK5K5G	22_PG09																						1
41	GOL	Basin_1_B(mid)	Lake 5	LK5K6B	22_PG09																						1
42	GOL	Basin_1_B(mid)	Lake 5	LK5K6C	50_PG17
43	GOL	Basin_1_B(mid)	Lake 5	LK5K6D	22_PG09																						1
44	GOL	Basin_1_B(mid)	Lake 5	LK5K6G	22_PG09																						1
45	GOL	Basin_1_B(mid)	Lake 5	LK5K8C	34_PAO																																		1
						4	0	0	1	0	0	0	0	0	0	0	1	0	0	0	0	0	0	0	0	0	8	0	0	0	0	0	0	0	0	0	0
1	HIN	Basin_1_A(top)	Lake 6	LK6K4C	01_PG02	1
2	HIN	Basin_1_A(top)	Lake 6	LK6K4D	01_PG02	1
3	HIN	Basin_1_A(top)	Lake 6	LK6K4H	01_PG02	1
4	HIN	Basin_1_A(top)	Lake 6	LK6K5B	01_PG02	1
5	HIN	Basin_1_A(top)	Lake 6	LK6K5C	16_PG07																1
6	HIN	Basin_1_A(top)	Lake 6	LK6K5D	01_PG02	1
7	HIN	Basin_1_A(top)	Lake 6	LK6K5F	16_PG07																1
8	HIN	Basin_1_A(top)	Lake 6	LK6K5G	35_PAO																																			1
9	HIN	Basin_1_A(top)	Lake 6	LK6K6A	01_PG02	1
10	HIN	Basin_1_A(top)	Lake 6	LK6K6C	01_PG02	1
11	HIN	Basin_1_A(top)	Lake 6	LK6K6E	01_PG02	1
12	HIN	Basin_1_A(top)	Lake 6	LK6K6H	01_PG02	1
13	HIN	Basin_1_A(top)	Lake 6	LK6K7D	01_PG02	1
14	HIN	Basin_1_A(top)	Lake 6	LK6K8A	69_PG17
15	HIN	Basin_1_A(top)	Lake 6	LK6K8E	69_PG17
16	HIN	Basin_1_A(top)	Lake 6	LK6K8F	01_PG02	1
17	HIN	Basin_1_A(top)	Lake 6	LK6K8H	01_PG02	1
18	HIN	Basin_1_A(top)	Lake 6	LK6K9A	01_PG02	1
19	HIN	Basin_1_A(top)	Lake 6	LK6K9B	01_PG02	1
20	HIN	Basin_1_A(top)	Lake 6	LK6K9F	01_PG02	1
21	HIN	Basin_1_A(top)	Lake 6	LK6K9H	01_PG02	1
						16	0	0	0	0	0	0	0	0	0	0	0	0	0	0	2	0	0	0	0	0	0	0	0	0	0	0	0	0	0	0	0
268	WOR	Basin_4_B(low)	Lake 7	LK7K5B	44_PG17																																												1
269	WOR	Basin_4_B(low)	Lake 7	LK7K5C	14_PG07														1
270	WOR	Basin_4_B(low)	Lake 7	LK7K5F	44_PG17																																												1
271	WOR	Basin_4_B(low)	Lake 7	LK7K5H	44_PG17																																												1
						0	0	0	0	0	0	0	0	0	0	0	0	0	1	0	0	0	0	0	0	0	0	0	0	0	0	0	0	0	0	0	0
219	OSS	Basin_4_A(top)	Lake 8	LK8K1A	01_PG02	1
220	OSS	Basin_4_A(top)	Lake 8	LK8K1B	32_PG13																																1
221	OSS	Basin_4_A(top)	Lake 8	LK8K1C	30_PG13																														1
222	OSS	Basin_4_A(top)	Lake 8	LK8K1D	18_PG09																		1
223	OSS	Basin_4_A(top)	Lake 8	LK8K1E	32_PG13																																1
224	OSS	Basin_4_A(top)	Lake 8	LK8K1F	32_PG13																																1
225	OSS	Basin_4_A(top)	Lake 8	LK8K1H	32_PG13																																1
226	OSS	Basin_4_A(top)	Lake 8	LK8K2A	45_PG17
227	OSS	Basin_4_A(top)	Lake 8	LK8K2C	05_PG02					1
228	OSS	Basin_4_A(top)	Lake 8	LK8K2E	30_PG13																														1
229	OSS	Basin_4_A(top)	Lake 8	LK8K2F	52_PG17
230	OSS	Basin_4_A(top)	Lake 8	LK8K2G	03_PG02			1
231	OSS	Basin_4_A(top)	Lake 8	LK8K2H	31_PG13																															1
232	OSS	Basin_4_A(top)	Lake 8	LK8K3A	32_PG13																																1
233	OSS	Basin_4_A(top)	Lake 8	LK8K3C	32_PG13																																1
234	OSS	Basin_4_A(top)	Lake 8	LK8K3D	32_PG13																																1
235	OSS	Basin_4_A(top)	Lake 8	LK8K3E	32_PG13																																1
236	OSS	Basin_4_A(top)	Lake 8	LK8K3F	32_PG13																																1
237	OSS	Basin_4_A(top)	Lake 8	LK8K4A	32_PG13																																1
238	OSS	Basin_4_A(top)	Lake 8	LK8K4B	01_PG02	1
239	OSS	Basin_4_A(top)	Lake 8	LK8K4C	01_PG02	1
240	OSS	Basin_4_A(top)	Lake 8	LK8K4E	01_PG02	1
241	OSS	Basin_4_A(top)	Lake 8	LK8K4F	01_PG02	1
242	OSS	Basin_4_A(top)	Lake 8	LK8K4H	01_PG02	1
243	OSS	Basin_4_A(top)	Lake 8	LK8K5A	01_PG02	1
244	OSS	Basin_4_A(top)	Lake 8	LK8K5B	32_PG13																																1
245	OSS	Basin_4_A(top)	Lake 8	LK8K5D	25_PG13																									1
246	OSS	Basin_4_A(top)	Lake 8	LK8K5G	32_PG13																																1
247	OSS	Basin_4_A(top)	Lake 8	LK8K5H	25_PG13																									1
248	OSS	Basin_4_A(top)	Lake 8	LK8K6B	27_PG13																											1
249	OSS	Basin_4_A(top)	Lake 8	LK8K6C	68_PG17
250	OSS	Basin_4_A(top)	Lake 8	LK8K6D	68_PG17
251	OSS	Basin_4_A(top)	Lake 8	LK8K6G	68_PG17
252	OSS	Basin_4_A(top)	Lake 8	LK8K6H	68_PG17
253	OSS	Basin_4_A(top)	Lake 8	LK8K7A	46_PG17
254	OSS	Basin_4_A(top)	Lake 8	LK8K7C	05_PG02					1
255	OSS	Basin_4_A(top)	Lake 8	LK8K7E	44_PG17																																												1
256	OSS	Basin_4_A(top)	Lake 8	LK8K7G	44_PG17																																												1
257	OSS	Basin_4_A(top)	Lake 8	LK8K7H	05_PG02					1
258	OSS	Basin_4_A(top)	Lake 8	LK8K8A	25_PG13																									1
259	OSS	Basin_4_A(top)	Lake 8	LK8K8B	05_PG02					1
260	OSS	Basin_4_A(top)	Lake 8	LK8K8C	14_PG07														1
261	OSS	Basin_4_A(top)	Lake 8	LK8K8D	14_PG07														1
262	OSS	Basin_4_A(top)	Lake 8	LK8K8E	05_PG02					1
263	OSS	Basin_4_A(top)	Lake 8	LK8K8F	05_PG02					1
264	OSS	Basin_4_A(top)	Lake 8	LK8K8H	19_PG09																			1
265	OSS	Basin_4_A(top)	Lake 8	LK8K9C	66_PG17
266	OSS	Basin_4_A(top)	Lake 8	LK8K9D	08_PG01								1
267	OSS	Basin_4_A(top)	Lake 8	LK8K9H	08_PG01								1
						7	0	1	0	6	0	0	2	0	0	0	0	0	2	0	0	0	1	1	0	0	0	0	0	3	0	1	0	0	2	1	12
272			STRAINS/HAPLOTYPE
273
274		Basin_1_A(top)	Lake 6	LK6K1B
275		Basin_1_A(top)	Lake 6	LK6K1C
276		Basin_1_A(top)	Lake 6	LK6K1D
277		Basin_1_A(top)	Lake 6	LK6K1F
278		Basin_1_A(top)	Lake 6	LK6K1G
279		Basin_1_A(top)	Lake 6	LK6K2C
280		Basin_1_A(top)	Lake 6	LK6K3B
281		Basin_1_A(top)	Lake 6	LK6K3C
282		Basin_1_A(top)	Lake 6	LK6K3D
283		Basin_1_A(top)	Lake 6	LK6K3E
284		Basin_1_A(top)	Lake 6	LK6K3G
285		Basin_1_A(top)	Lake 6	LK6K3H
286		Basin_1_A(top)	Lake 6	LK6K5A
287		Basin_1_A(top)	Lake 6	LK6K5E
288		Basin_1_A(top)	Lake 6	LK6K5H
289		Basin_1_A(top)	Lake 6	LK6K7A
290		Basin_1_A(top)	Lake 6	LK6K7B
291		Basin_1_A(top)	Lake 6	LK6K7F
292		Basin_1_A(top)	Lake 6	LK6K7G
293		Basin_1_A(top)	Lake 6	LK6K9C
294		Basin_1_A(top)	Lake 6	LK6K9D
295		Basin_1_A(top)	Lake 6	LK6K9E
296		Basin_1_A(top)	Lake 6	LK6K9G
297		Basin_1_B(mid)	Lake 5	LK5K1A
298		Basin_1_B(mid)	Lake 5	LK5K1C
299		Basin_1_B(mid)	Lake 5	LK5K1E
300		Basin_1_B(mid)	Lake 5	LK5K1G
301		Basin_1_B(mid)	Lake 5	LK5K2D
302		Basin_1_B(mid)	Lake 5	LK5K2E
303		Basin_1_B(mid)	Lake 5	LK5K2G
304		Basin_1_B(mid)	Lake 5	LK5K2H
305		Basin_1_B(mid)	Lake 5	LK5K3A
306		Basin_1_B(mid)	Lake 5	LK5K3B
307		Basin_1_B(mid)	Lake 5	LK5K3C
308		Basin_1_B(mid)	Lake 5	LK5K3D
309		Basin_1_B(mid)	Lake 5	LK5K3E
310		Basin_1_B(mid)	Lake 5	LK5K3F
311		Basin_1_B(mid)	Lake 5	LK5K3G
312		Basin_1_B(mid)	Lake 5	LK5K3H
313		Basin_1_B(mid)	Lake 5	LK5K5D
314		Basin_1_B(mid)	Lake 5	LK5K5F
315		Basin_1_B(mid)	Lake 5	LK5K5H
316		Basin_1_B(mid)	Lake 5	LK5K6E
317		Basin_1_B(mid)	Lake 5	LK5K6F
318		Basin_1_B(mid)	Lake 5	LK5K6H
319		Basin_1_B(mid)	Lake 5	LK5K7B
320		Basin_1_B(mid)	Lake 5	LK5K7D
321		Basin_1_B(mid)	Lake 5	LK5K7E
322		Basin_1_B(mid)	Lake 5	LK5K7F
323		Basin_1_B(mid)	Lake 5	LK5K7G
324		Basin_1_B(mid)	Lake 5	LK5K8A
325		Basin_1_B(mid)	Lake 5	LK5K8B
326		Basin_1_B(mid)	Lake 5	LK5K8E
327		Basin_1_B(mid)	Lake 5	LK5K8G
328		Basin_1_B(mid)	Lake 5	LK5K8H
329		Basin_1_C(low)	Lake 3	LK3K1A
330		Basin_1_C(low)	Lake 3	LK3K1F
331		Basin_1_C(low)	Lake 3	LK3K3A
332		Basin_1_C(low)	Lake 3	LK3K3C
333		Basin_1_C(low)	Lake 3	LK3K3D
334		Basin_1_C(low)	Lake 3	LK3K3H
335		Basin_1_C(low)	Lake 3	LK3K6A
336		Basin_1_C(low)	Lake 3	LK3K6E
337		Basin_1_C(low)	Lake 3	LK3K8B
338		Basin_1_C(low)	Lake 3	LK3K9B
339		Basin_1_C(low)	Lake 3	LK3K9F
340		Basin_1_C(low)	Lake 3	LK3K9G
341		Basin_1_C(low)	Lake 3	LK3K9H
342		Basin_2	Lake 1	LK1K1A
343		Basin_2	Lake 1	LK1K1B
344		Basin_2	Lake 1	LK1K1C
345		Basin_2	Lake 1	LK1K1D
346		Basin_2	Lake 1	LK1K1E
347		Basin_2	Lake 1	LK1K1G
348		Basin_2	Lake 1	LK1K2B
349		Basin_2	Lake 1	LK1K2E
350		Basin_2	Lake 1	LK1K2F
351		Basin_2	Lake 1	LK1K2G
352		Basin_2	Lake 1	LK1K2H
353		Basin_2	Lake 1	LK1K7A
354		Basin_2	Lake 1	LK1K7C
355		Basin_2	Lake 1	LK1K7F
356		Basin_2	Lake 1	LK1K7G
357		Basin_2	Lake 1	LK1K7H
358		Basin_2	Lake 1	LK1K9E
359		Basin_3_A(top)	Lake 4	LK4K4F
360		Basin_3_A(top)	Lake 4	LK4K4H
361		Basin_3_A(top)	Lake 4	LK4K7A
362		Basin_3_A(top)	Lake 4	LK4K7G
363		Basin_3_A(top)	Lake 4	LK4K8G
364		Basin_3_A(top)	Lake 4	LK4K9A
365		Basin_3_A(top)	Lake 4	LK4K9C
366		Basin_3_A(top)	Lake 4	LK4K9E
367		Basin_3_A(top)	Lake 4	LK4P9G
368		Basin_3_A(top)	Lake 4	LK4P9H
369		Basin_3_B(low)	Lake 2	LK2K3A
370		Basin_3_B(low)	Lake 2	LK2K4B
371		Basin_3_B(low)	Lake 2	LK2K4E
372		Basin_3_B(low)	Lake 2	LK2K4F
373		Basin_3_B(low)	Lake 2	LK2K6B
374		Basin_3_B(low)	Lake 2	LK2K7A
375		Basin_3_B(low)	Lake 2	LK2K8A
376		Basin_3_B(low)	Lake 2	LK2K8B
377		Basin_3_B(low)	Lake 2	LK2K8C
378		Basin_3_B(low)	Lake 2	LK2K8D
379		Basin_3_B(low)	Lake 2	LK2K8F
380		Basin_3_B(low)	Lake 2	LK2K8H
381		Basin_3_B(low)	Lake 2	LK2K9E
382		Basin_3_B(low)	Lake 2	LK2K9G
383		Basin_4_A(top)	Lake 8	LK8K2D
384		Basin_4_A(top)	Lake 8	LK8K5E
385		Basin_4_A(top)	Lake 8	LK8K7D
386		Basin_4_A(top)	Lake 8	LK8K9F
387		Basin_4_B(low)	Lake 7	LK7K1A
388		Basin_4_B(low)	Lake 7	LK7K1B
389		Basin_4_B(low)	Lake 7	LK7K1C
390		Basin_4_B(low)	Lake 7	LK7K1D
391		Basin_4_B(low)	Lake 7	LK7K1E
392		Basin_4_B(low)	Lake 7	LK7K1F
393		Basin_4_B(low)	Lake 7	LK7K1G
394		Basin_4_B(low)	Lake 7	LK7K1H
395		Basin_4_B(low)	Lake 7	LK7K2C
396		Basin_4_B(low)	Lake 7	LK7K2D
397		Basin_4_B(low)	Lake 7	LK7K2E
398		Basin_4_B(low)	Lake 7	LK7K3A
399		Basin_4_B(low)	Lake 7	LK7K3B
400		Basin_4_B(low)	Lake 7	LK7K3C
401		Basin_4_B(low)	Lake 7	LK7K3D
402		Basin_4_B(low)	Lake 7	LK7K3E
403		Basin_4_B(low)	Lake 7	LK7K3F
404		Basin_4_B(low)	Lake 7	LK7K3G
405		Basin_4_B(low)	Lake 7	LK7K3H
406		Basin_4_B(low)	Lake 7	LK7K4C
407		Basin_4_B(low)	Lake 7	LK7K4D
408		Basin_4_B(low)	Lake 7	LK7K4F
409		Basin_4_B(low)	Lake 7	LK7K5A
410		Basin_4_B(low)	Lake 7	LK7K6A
411		Basin_4_B(low)	Lake 7	LK7K6B
412		Basin_4_B(low)	Lake 7	LK7K6C
413		Basin_4_B(low)	Lake 7	LK7K6D
414		Basin_4_B(low)	Lake 7	LK7K6E
415		Basin_4_B(low)	Lake 7	LK7K6F
416		Basin_4_B(low)	Lake 7	LK7K6G
417		Basin_4_B(low)	Lake 7	LK7K6H
[truncated: 42 more columns]

## Sheet: Lake_sort_SUM_EACH_HT_all_to_70
				Haplotype#		1	2	3	4	5	6	7	8	9	10	11	12	13	14	15	16	17	18	19	20	21	22	23	24	25	26	27	28	29	30	31	32	33	34	35	36	37	38	39	40	41	42	43	44
Original order (CEM)	Lake code	Basin	# Lake	Isolate ID	HT_PG	01_PG02	02_PG02	03_PG02	04_PG02	05_PG02	06_PG02	07_PG02	08_PG01ex	09_PG01	10_PG01	11_PG01	12_PG01	13_PG10	14_PG07	15_PG07	16_PG07	17_PG07	18_PG09	19_PG09	20_PG09	21_PG09	22_PG09	23_PG14ex	24_PG15ex	25_PG13	26_PG13	27_PG13	28_PG13	29_PG13	30_PG13ex	31_PG13ex	32_PG13ex	33_PAOex	34_PAOex	35_PAOex	36_PAOex	37_PAOex	38_PAOex	39_PAOex	40_PAOex	41_PAOex	42_PAOsx	43_PAOex	44_PG17ex
87	ALT	Basin_2	Lake 1	LK1K1F	21_PG09																					1
88	ALT	Basin_2	Lake 1	LK1K2C	38_PAO																																						1
89	ALT	Basin_2	Lake 1	LK1K5G	70_PG17
90	ALT	Basin_2	Lake 1	LK1K6A	44_PG17																																												1
91	ALT	Basin_2	Lake 1	LK1K6C	22_PG09																						1
92	ALT	Basin_2	Lake 1	LK1K6D	22_PG09																						1
93	ALT	Basin_2	Lake 1	LK1K6E	22_PG09																						1
94	ALT	Basin_2	Lake 1	LK1K6F	44_PG17																																												1
95	ALT	Basin_2	Lake 1	LK1K6G	22_PG09																						1
96	ALT	Basin_2	Lake 1	LK1K6H	67_PG17
97	ALT	Basin_2	Lake 1	LK1K7B	67_PG17
98	ALT	Basin_2	Lake 1	LK1K7D	23_PG14																							1
99	ALT	Basin_2	Lake 1	LK1K7E	22_PG09																						1
100	ALT	Basin_2	Lake 1	LK1K8A	70_PG17
101	ALT	Basin_2	Lake 1	LK1K8B	52_PG17
102	ALT	Basin_2	Lake 1	LK1K8D	52_PG17
103	ALT	Basin_2	Lake 1	LK1K8E	52_PG17
104	ALT	Basin_2	Lake 1	LK1K8F	61_PG17
105	ALT	Basin_2	Lake 1	LK1K8G	57_PG17
106	ALT	Basin_2	Lake 1	LK1K8H	22_PG09																						1
107	ALT	Basin_2	Lake 1	LK1K9A	65_PG17
108	ALT	Basin_2	Lake 1	LK1K9B	61_PG17
109	ALT	Basin_2	Lake 1	LK1K9C	22_PG09																						1
110	ALT	Basin_2	Lake 1	LK1K9D	63_PG17
111	ALT	Basin_2	Lake 1	LK1K9F	47_PG17
112	ALT	Basin_2	Lake 1	LK1K9G	22_PG09																						1
						0	0	0	0	0	0	0	0	0	0	0	0	0	0	0	0	0	0	0	0	1	8	1	0	0	0	0	0	0	0	0	0	0	0	0	0	0	1	0	0	0	0	0	2
166	GRU	Basin_3_B(low)	Lake 2	LK2K1A	10_PG01										1
167	GRU	Basin_3_B(low)	Lake 2	LK2K1B	05_PG02					1
168	GRU	Basin_3_B(low)	Lake 2	LK2K1C	13_PG10													1
169	GRU	Basin_3_B(low)	Lake 2	LK2K1D	47_PG17
170	GRU	Basin_3_B(low)	Lake 2	LK2K1F	65_PG17
171	GRU	Basin_3_B(low)	Lake 2	LK2K1G	47_PG17
172	GRU	Basin_3_B(low)	Lake 2	LK2K1H	65_PG17
173	GRU	Basin_3_B(low)	Lake 2	LK2K2A	67_PG17
174	GRU	Basin_3_B(low)	Lake 2	LK2K2B	70_PG17
175	GRU	Basin_3_B(low)	Lake 2	LK2K2C	07_PG02							1
176	GRU	Basin_3_B(low)	Lake 2	LK2K2D	49_PG17
177	GRU	Basin_3_B(low)	Lake 2	LK2K2F	07_PG02							1
178	GRU	Basin_3_B(low)	Lake 2	LK2K2G	15_PG07															1
179	GRU	Basin_3_B(low)	Lake 2	LK2K2H	07_PG02							1
180	GRU	Basin_3_B(low)	Lake 2	LK2K3B	58_PG17
181	GRU	Basin_3_B(low)	Lake 2	LK2K3C	05_PG02					1
182	GRU	Basin_3_B(low)	Lake 2	LK2K3D	54_PG17
183	GRU	Basin_3_B(low)	Lake 2	LK2K3E	48_PG17
184	GRU	Basin_3_B(low)	Lake 2	LK2K3F	03_PG02			1
185	GRU	Basin_3_B(low)	Lake 2	LK2K3G	39_PAO																																							1
186	GRU	Basin_3_B(low)	Lake 2	LK2K4A	32_PG13																																1
187	GRU	Basin_3_B(low)	Lake 2	LK2K4C	14_PG07														1
188	GRU	Basin_3_B(low)	Lake 2	LK2K4D	51_PG17
189	GRU	Basin_3_B(low)	Lake 2	LK2K4G	55_PG17
190	GRU	Basin_3_B(low)	Lake 2	LK2K4H	32_PG13																																1
191	GRU	Basin_3_B(low)	Lake 2	LK2K5A	17_PG07																	1
192	GRU	Basin_3_B(low)	Lake 2	LK2K5B	17_PG07																	1
193	GRU	Basin_3_B(low)	Lake 2	LK2K5C	16_PG07																1
194	GRU	Basin_3_B(low)	Lake 2	LK2K5D	17_PG07																	1
195	GRU	Basin_3_B(low)	Lake 2	LK2K5E	04_PG02				1
196	GRU	Basin_3_B(low)	Lake 2	LK2K5F	16_PG07																1
197	GRU	Basin_3_B(low)	Lake 2	LK2K5G	60_PG17
198	GRU	Basin_3_B(low)	Lake 2	LK2K5H	17_PG07																	1
199	GRU	Basin_3_B(low)	Lake 2	LK2K6A	36_PAO																																				1
200	GRU	Basin_3_B(low)	Lake 2	LK2K6D	04_PG02				1
201	GRU	Basin_3_B(low)	Lake 2	LK2K6E	14_PG07														1
202	GRU	Basin_3_B(low)	Lake 2	LK2K6F	67_PG17
203	GRU	Basin_3_B(low)	Lake 2	LK2K6G	67_PG17
204	GRU	Basin_3_B(low)	Lake 2	LK2K6H	67_PG17
205	GRU	Basin_3_B(low)	Lake 2	LK2K7B	67_PG17
206	GRU	Basin_3_B(low)	Lake 2	LK2K7C	59_PG17
207	GRU	Basin_3_B(low)	Lake 2	LK2K7D	06_PG02						1
208	GRU	Basin_3_B(low)	Lake 2	LK2K7E	07_PG02							1
209	GRU	Basin_3_B(low)	Lake 2	LK2K7F	59_PG17
210	GRU	Basin_3_B(low)	Lake 2	LK2K7G	05_PG02					1
211	GRU	Basin_3_B(low)	Lake 2	LK2K7H	05_PG02					1
212	GRU	Basin_3_B(low)	Lake 2	LK2K8E	67_PG17
213	GRU	Basin_3_B(low)	Lake 2	LK2K8G	29_PG13																													1
214	GRU	Basin_3_B(low)	Lake 2	LK2K9A	07_PG02							1
215	GRU	Basin_3_B(low)	Lake 2	LK2K9C	56_PG17
216	GRU	Basin_3_B(low)	Lake 2	LK2K9D	03_PG02			1
217	GRU	Basin_3_B(low)	Lake 2	LK2K9F	03_PG02			1
218	GRU	Basin_3_B(low)	Lake 2	LK2K9H	03_PG02			1
						0	0	4	2	4	1	5	0	0	1	0	0	1	2	1	2	4	0	0	0	0	0	0	0	0	0	0	0	1	0	0	2	0	0	0	1	0	0	1	0	0	0	0	0
46	GOS	Basin_1_C(low)	Lake 3	LK3K1B	01_PG02	1
47	GOS	Basin_1_C(low)	Lake 3	LK3K1C	01_PG02	1
48	GOS	Basin_1_C(low)	Lake 3	LK3K1D	01_PG02	1
49	GOS	Basin_1_C(low)	Lake 3	LK3K1H	01_PG02	1
50	GOS	Basin_1_C(low)	Lake 3	LK3K2B	01_PG02	1
51	GOS	Basin_1_C(low)	Lake 3	LK3K2C	02_PG02		1
52	GOS	Basin_1_C(low)	Lake 3	LK3K2F	01_PG02	1
53	GOS	Basin_1_C(low)	Lake 3	LK3K2G	01_PG02	1
54	GOS	Basin_1_C(low)	Lake 3	LK3K2H	41_PAO																																									1
55	GOS	Basin_1_C(low)	Lake 3	LK3K3B	01_PG02	1
56	GOS	Basin_1_C(low)	Lake 3	LK3K4C	11_PG01											1
57	GOS	Basin_1_C(low)	Lake 3	LK3K4E	01_PG02	1
58	GOS	Basin_1_C(low)	Lake 3	LK3K4G	01_PG02	1
59	GOS	Basin_1_C(low)	Lake 3	LK3K4H	01_PG02	1
60	GOS	Basin_1_C(low)	Lake 3	LK3K5B	01_PG02	1
61	GOS	Basin_1_C(low)	Lake 3	LK3K5C	01_PG02	1
62	GOS	Basin_1_C(low)	Lake 3	LK3K5D	01_PG02	1
63	GOS	Basin_1_C(low)	Lake 3	LK3K5F	01_PG02	1
64	GOS	Basin_1_C(low)	Lake 3	LK3K5G	01_PG02	1
65	GOS	Basin_1_C(low)	Lake 3	LK3K5H	01_PG02	1
66	GOS	Basin_1_C(low)	Lake 3	LK3K6B	01_PG02	1
67	GOS	Basin_1_C(low)	Lake 3	LK3K6C	24_PG15																								1
68	GOS	Basin_1_C(low)	Lake 3	LK3K6D	01_PG02	1
69	GOS	Basin_1_C(low)	Lake 3	LK3K6F	01_PG02	1
70	GOS	Basin_1_C(low)	Lake 3	LK3K6G	04_PG02				1
71	GOS	Basin_1_C(low)	Lake 3	LK3K6H	24_PG15																								1
72	GOS	Basin_1_C(low)	Lake 3	LK3K7B	22_PG09																						1
73	GOS	Basin_1_C(low)	Lake 3	LK3K7C	22_PG09																						1
74	GOS	Basin_1_C(low)	Lake 3	LK3K7D	22_PG09																						1
75	GOS	Basin_1_C(low)	Lake 3	LK3K7E	22_PG09																						1
76	GOS	Basin_1_C(low)	Lake 3	LK3K7F	22_PG09																						1
77	GOS	Basin_1_C(low)	Lake 3	LK3K7G	22_PG09																						1
78	GOS	Basin_1_C(low)	Lake 3	LK3K7H	22_PG09																						1
79	GOS	Basin_1_C(low)	Lake 3	LK3K8A	14_PG07														1
80	GOS	Basin_1_C(low)	Lake 3	LK3K8C	22_PG09																						1
81	GOS	Basin_1_C(low)	Lake 3	LK3K8D	14_PG07														1
82	GOS	Basin_1_C(low)	Lake 3	LK3K8E	22_PG09																						1
83	GOS	Basin_1_C(low)	Lake 3	LK3K8F	22_PG09																						1
84	GOS	Basin_1_C(low)	Lake 3	LK3K8H	22_PG09																						1
85	GOS	Basin_1_C(low)	Lake 3	LK3K9D	22_PG09																						1
86	GOS	Basin_1_C(low)	Lake 3	LK3K9E	40_PAO																																								1
						20	1	0	1	0	0	0	0	0	0	1	0	0	2	0	0	0	0	0	0	0	12	0	2	0	0	0	0	0	0	0	0	0	0	0	0	0	0	0	1	1	0	0	0
113	TOP	Basin_3_A(top)	Lake 4	LK4K1G	04_PG02				1
114	TOP	Basin_3_A(top)	Lake 4	LK4K1H	14_PG07														1
115	TOP	Basin_3_A(top)	Lake 4	LK4K2A	63_PG17
116	TOP	Basin_3_A(top)	Lake 4	LK4K2B	61_PG17
117	TOP	Basin_3_A(top)	Lake 4	LK4K2C	26_PG13																										1
118	TOP	Basin_3_A(top)	Lake 4	LK4K2D	14_PG07														1
119	TOP	Basin_3_A(top)	Lake 4	LK4K2E	64_PG17
120	TOP	Basin_3_A(top)	Lake 4	LK4K2F	54_PG17
121	TOP	Basin_3_A(top)	Lake 4	LK4K2G	62_PG17
122	TOP	Basin_3_A(top)	Lake 4	LK4K2H	14_PG07														1
123	TOP	Basin_3_A(top)	Lake 4	LK4K3A	20_PG09																				1
124	TOP	Basin_3_A(top)	Lake 4	LK4K3B	20_PG09																				1
125	TOP	Basin_3_A(top)	Lake 4	LK4K3C	20_PG09																				1
126	TOP	Basin_3_A(top)	Lake 4	LK4K3D	20_PG09																				1
127	TOP	Basin_3_A(top)	Lake 4	LK4K3E	20_PG09																				1
128	TOP	Basin_3_A(top)	Lake 4	LK4K3F	20_PG09																				1
129	TOP	Basin_3_A(top)	Lake 4	LK4K3G	20_PG09																				1
130	TOP	Basin_3_A(top)	Lake 4	LK4K3H	20_PG09																				1
131	TOP	Basin_3_A(top)	Lake 4	LK4K4A	33_PAO																																	1
132	TOP	Basin_3_A(top)	Lake 4	LK4K4B	18_PG09																		1
133	TOP	Basin_3_A(top)	Lake 4	LK4K4C	04_PG02				1
134	TOP	Basin_3_A(top)	Lake 4	LK4K4D	20_PG09																				1
135	TOP	Basin_3_A(top)	Lake 4	LK4K4E	67_PG17
136	TOP	Basin_3_A(top)	Lake 4	LK4K4G	64_PG17
137	TOP	Basin_3_A(top)	Lake 4	LK4K5A	67_PG17
138	TOP	Basin_3_A(top)	Lake 4	LK4K5B	16_PG07																1
139	TOP	Basin_3_A(top)	Lake 4	LK4K5C	16_PG07																1
140	TOP	Basin_3_A(top)	Lake 4	LK4K5D	67_PG17
141	TOP	Basin_3_A(top)	Lake 4	LK4K5E	16_PG07																1
142	TOP	Basin_3_A(top)	Lake 4	LK4K5F	16_PG07																1
143	TOP	Basin_3_A(top)	Lake 4	LK4K6A	14_PG07														1
144	TOP	Basin_3_A(top)	Lake 4	LK4K6B	16_PG07																1
145	TOP	Basin_3_A(top)	Lake 4	LK4K6C	11_PG01											1
146	TOP	Basin_3_A(top)	Lake 4	LK4K6D	16_PG07																1
147	TOP	Basin_3_A(top)	Lake 4	LK4K6E	18_PG09																		1
148	TOP	Basin_3_A(top)	Lake 4	LK4K6F	18_PG09																		1
149	TOP	Basin_3_A(top)	Lake 4	LK4K6G	18_PG09																		1
150	TOP	Basin_3_A(top)	Lake 4	LK4K6H	18_PG09																		1
151	TOP	Basin_3_A(top)	Lake 4	LK4K7B	04_PG02				1
152	TOP	Basin_3_A(top)	Lake 4	LK4K7C	04_PG02				1
153	TOP	Basin_3_A(top)	Lake 4	LK4K7D	28_PG13																												1
154	TOP	Basin_3_A(top)	Lake 4	LK4K7E	04_PG02				1
155	TOP	Basin_3_A(top)	Lake 4	LK4K7F	09_PG01									1
156	TOP	Basin_3_A(top)	Lake 4	LK4K7H	12_PG01												1
157	TOP	Basin_3_A(top)	Lake 4	LK4K8A	68_PG17
158	TOP	Basin_3_A(top)	Lake 4	LK4K8B	55_PG17
159	TOP	Basin_3_A(top)	Lake 4	LK4K8C	54_PG17
160	TOP	Basin_3_A(top)	Lake 4	LK4K8D	04_PG02				1
161	TOP	Basin_3_A(top)	Lake 4	LK4K8E	16_PG07																1
162	TOP	Basin_3_A(top)	Lake 4	LK4K8F	54_PG17
163	TOP	Basin_3_A(top)	Lake 4	LK4K8H	53_PG17
164	TOP	Basin_3_A(top)	Lake 4	LK4K9B	04_PG02				1
165	TOP	Basin_3_A(top)	Lake 4	LK4K9F	37_PAO																																					1
						0	0	0	7	0	0	0	0	1	0	1	1	0	4	0	7	0	5	0	9	0	0	0	0	0	1	0	1	0	0	0	0	1	0	0	0	1	0	0	0	0	0	0	0
22	GOL	Basin_1_B(mid)	Lake 5	LK5K1B	12_PG01												1
23	GOL	Basin_1_B(mid)	Lake 5	LK5K1D	70_PG17
24	GOL	Basin_1_B(mid)	Lake 5	LK5K1F	70_PG17
25	GOL	Basin_1_B(mid)	Lake 5	LK5K1H	22_PG09																						1
26	GOL	Basin_1_B(mid)	Lake 5	LK5K2A	01_PG02	1
27	GOL	Basin_1_B(mid)	Lake 5	LK5K2B	01_PG02	1
28	GOL	Basin_1_B(mid)	Lake 5	LK5K2C	01_PG02	1
29	GOL	Basin_1_B(mid)	Lake 5	LK5K2F	04_PG02				1
30	GOL	Basin_1_B(mid)	Lake 5	LK5K4A	70_PG17
31	GOL	Basin_1_B(mid)	Lake 5	LK5K4B	70_PG17
32	GOL	Basin_1_B(mid)	Lake 5	LK5K4C	01_PG02	1
33	GOL	Basin_1_B(mid)	Lake 5	LK5K4D	42_PAO																																										1
34	GOL	Basin_1_B(mid)	Lake 5	LK5K4E	70_PG17
35	GOL	Basin_1_B(mid)	Lake 5	LK5K4F	70_PG17
36	GOL	Basin_1_B(mid)	Lake 5	LK5K4G	22_PG09																						1
37	GOL	Basin_1_B(mid)	Lake 5	LK5K4H	43_PAO																																											1
38	GOL	Basin_1_B(mid)	Lake 5	LK5K5B	22_PG09																						1
39	GOL	Basin_1_B(mid)	Lake 5	LK5K5E	22_PG09																						1
40	GOL	Basin_1_B(mid)	Lake 5	LK5K5G	22_PG09																						1
41	GOL	Basin_1_B(mid)	Lake 5	LK5K6B	22_PG09																						1
42	GOL	Basin_1_B(mid)	Lake 5	LK5K6C	50_PG17
43	GOL	Basin_1_B(mid)	Lake 5	LK5K6D	22_PG09																						1
44	GOL	Basin_1_B(mid)	Lake 5	LK5K6G	22_PG09																						1
45	GOL	Basin_1_B(mid)	Lake 5	LK5K8C	34_PAO																																		1
						4	0	0	1	0	0	0	0	0	0	0	1	0	0	0	0	0	0	0	0	0	8	0	0	0	0	0	0	0	0	0	0	0	1	0	0	0	0	0	0	0	1	1	0
1	HIN	Basin_1_A(top)	Lake 6	LK6K4C	01_PG02	1
2	HIN	Basin_1_A(top)	Lake 6	LK6K4D	01_PG02	1
3	HIN	Basin_1_A(top)	Lake 6	LK6K4H	01_PG02	1
4	HIN	Basin_1_A(top)	Lake 6	LK6K5B	01_PG02	1
5	HIN	Basin_1_A(top)	Lake 6	LK6K5C	16_PG07																1
6	HIN	Basin_1_A(top)	Lake 6	LK6K5D	01_PG02	1
7	HIN	Basin_1_A(top)	Lake 6	LK6K5F	16_PG07																1
8	HIN	Basin_1_A(top)	Lake 6	LK6K5G	35_PAO																																			1
9	HIN	Basin_1_A(top)	Lake 6	LK6K6A	01_PG02	1
10	HIN	Basin_1_A(top)	Lake 6	LK6K6C	01_PG02	1
11	HIN	Basin_1_A(top)	Lake 6	LK6K6E	01_PG02	1
12	HIN	Basin_1_A(top)	Lake 6	LK6K6H	01_PG02	1
13	HIN	Basin_1_A(top)	Lake 6	LK6K7D	01_PG02	1
14	HIN	Basin_1_A(top)	Lake 6	LK6K8A	69_PG17
15	HIN	Basin_1_A(top)	Lake 6	LK6K8E	69_PG17
16	HIN	Basin_1_A(top)	Lake 6	LK6K8F	01_PG02	1
17	HIN	Basin_1_A(top)	Lake 6	LK6K8H	01_PG02	1
18	HIN	Basin_1_A(top)	Lake 6	LK6K9A	01_PG02	1
19	HIN	Basin_1_A(top)	Lake 6	LK6K9B	01_PG02	1
20	HIN	Basin_1_A(top)	Lake 6	LK6K9F	01_PG02	1
21	HIN	Basin_1_A(top)	Lake 6	LK6K9H	01_PG02	1
						16	0	0	0	0	0	0	0	0	0	0	0	0	0	0	2	0	0	0	0	0	0	0	0	0	0	0	0	0	0	0	0	0	0	1	0	0	0	0	0	0	0	0	0
268	WOR	Basin_4_B(low)	Lake 7	LK7K5B	44_PG17																																												1
269	WOR	Basin_4_B(low)	Lake 7	LK7K5C	14_PG07														1
270	WOR	Basin_4_B(low)	Lake 7	LK7K5F	44_PG17																																												1
271	WOR	Basin_4_B(low)	Lake 7	LK7K5H	44_PG17																																												1
						0	0	0	0	0	0	0	0	0	0	0	0	0	1	0	0	0	0	0	0	0	0	0	0	0	0	0	0	0	0	0	0	0	0	0	0	0	0	0	0	0	0	0	3
219	OSS	Basin_4_A(top)	Lake 8	LK8K1A	01_PG02	1
220	OSS	Basin_4_A(top)	Lake 8	LK8K1B	32_PG13																																1
221	OSS	Basin_4_A(top)	Lake 8	LK8K1C	30_PG13																														1
222	OSS	Basin_4_A(top)	Lake 8	LK8K1D	18_PG09																		1
223	OSS	Basin_4_A(top)	Lake 8	LK8K1E	32_PG13																																1
224	OSS	Basin_4_A(top)	Lake 8	LK8K1F	32_PG13																																1
225	OSS	Basin_4_A(top)	Lake 8	LK8K1H	32_PG13																																1
226	OSS	Basin_4_A(top)	Lake 8	LK8K2A	45_PG17
227	OSS	Basin_4_A(top)	Lake 8	LK8K2C	05_PG02					1
228	OSS	Basin_4_A(top)	Lake 8	LK8K2E	30_PG13																														1
229	OSS	Basin_4_A(top)	Lake 8	LK8K2F	52_PG17
230	OSS	Basin_4_A(top)	Lake 8	LK8K2G	03_PG02			1
231	OSS	Basin_4_A(top)	Lake 8	LK8K2H	31_PG13																															1
232	OSS	Basin_4_A(top)	Lake 8	LK8K3A	32_PG13																																1
233	OSS	Basin_4_A(top)	Lake 8	LK8K3C	32_PG13																																1
234	OSS	Basin_4_A(top)	Lake 8	LK8K3D	32_PG13																																1
235	OSS	Basin_4_A(top)	Lake 8	LK8K3E	32_PG13																																1
236	OSS	Basin_4_A(top)	Lake 8	LK8K3F	32_PG13																																1
237	OSS	Basin_4_A(top)	Lake 8	LK8K4A	32_PG13																																1
238	OSS	Basin_4_A(top)	Lake 8	LK8K4B	01_PG02	1
239	OSS	Basin_4_A(top)	Lake 8	LK8K4C	01_PG02	1
240	OSS	Basin_4_A(top)	Lake 8	LK8K4E	01_PG02	1
241	OSS	Basin_4_A(top)	Lake 8	LK8K4F	01_PG02	1
242	OSS	Basin_4_A(top)	Lake 8	LK8K4H	01_PG02	1
243	OSS	Basin_4_A(top)	Lake 8	LK8K5A	01_PG02	1
244	OSS	Basin_4_A(top)	Lake 8	LK8K5B	32_PG13																																1
245	OSS	Basin_4_A(top)	Lake 8	LK8K5D	25_PG13																									1
246	OSS	Basin_4_A(top)	Lake 8	LK8K5G	32_PG13																																1
247	OSS	Basin_4_A(top)	Lake 8	LK8K5H	25_PG13																									1
248	OSS	Basin_4_A(top)	Lake 8	LK8K6B	27_PG13																											1
249	OSS	Basin_4_A(top)	Lake 8	LK8K6C	68_PG17
250	OSS	Basin_4_A(top)	Lake 8	LK8K6D	68_PG17
251	OSS	Basin_4_A(top)	Lake 8	LK8K6G	68_PG17
252	OSS	Basin_4_A(top)	Lake 8	LK8K6H	68_PG17
253	OSS	Basin_4_A(top)	Lake 8	LK8K7A	46_PG17
254	OSS	Basin_4_A(top)	Lake 8	LK8K7C	05_PG02					1
255	OSS	Basin_4_A(top)	Lake 8	LK8K7E	44_PG17																																												1
256	OSS	Basin_4_A(top)	Lake 8	LK8K7G	44_PG17																																												1
257	OSS	Basin_4_A(top)	Lake 8	LK8K7H	05_PG02					1
258	OSS	Basin_4_A(top)	Lake 8	LK8K8A	25_PG13																									1
259	OSS	Basin_4_A(top)	Lake 8	LK8K8B	05_PG02					1
260	OSS	Basin_4_A(top)	Lake 8	LK8K8C	14_PG07														1
261	OSS	Basin_4_A(top)	Lake 8	LK8K8D	14_PG07														1
262	OSS	Basin_4_A(top)	Lake 8	LK8K8E	05_PG02					1
263	OSS	Basin_4_A(top)	Lake 8	LK8K8F	05_PG02					1
264	OSS	Basin_4_A(top)	Lake 8	LK8K8H	19_PG09																			1
265	OSS	Basin_4_A(top)	Lake 8	LK8K9C	66_PG17
266	OSS	Basin_4_A(top)	Lake 8	LK8K9D	08_PG01								1
267	OSS	Basin_4_A(top)	Lake 8	LK8K9H	08_PG01								1
						7	0	1	0	6	0	0	2	0	0	0	0	0	2	0	0	0	1	1	0	0	0	0	0	3	0	1	0	0	2	1	12	0	0	0	0	0	0	0	0	0	0	0	2
272			STRAINS/HAPLOTYPE
273
274		Basin_1_A(top)	Lake 6	LK6K1B
275		Basin_1_A(top)	Lake 6	LK6K1C
276		Basin_1_A(top)	Lake 6	LK6K1D
277		Basin_1_A(top)	Lake 6	LK6K1F
278		Basin_1_A(top)	Lake 6	LK6K1G
279		Basin_1_A(top)	Lake 6	LK6K2C
280		Basin_1_A(top)	Lake 6	LK6K3B
281		Basin_1_A(top)	Lake 6	LK6K3C
282		Basin_1_A(top)	Lake 6	LK6K3D
283		Basin_1_A(top)	Lake 6	LK6K3E
284		Basin_1_A(top)	Lake 6	LK6K3G
285		Basin_1_A(top)	Lake 6	LK6K3H
286		Basin_1_A(top)	Lake 6	LK6K5A
287		Basin_1_A(top)	Lake 6	LK6K5E
288		Basin_1_A(top)	Lake 6	LK6K5H
289		Basin_1_A(top)	Lake 6	LK6K7A
290		Basin_1_A(top)	Lake 6	LK6K7B
291		Basin_1_A(top)	Lake 6	LK6K7F
292		Basin_1_A(top)	Lake 6	LK6K7G
293		Basin_1_A(top)	Lake 6	LK6K9C
294		Basin_1_A(top)	Lake 6	LK6K9D
295		Basin_1_A(top)	Lake 6	LK6K9E
296		Basin_1_A(top)	Lake 6	LK6K9G
297		Basin_1_B(mid)	Lake 5	LK5K1A
298		Basin_1_B(mid)	Lake 5	LK5K1C
299		Basin_1_B(mid)	Lake 5	LK5K1E
300		Basin_1_B(mid)	Lake 5	LK5K1G
301		Basin_1_B(mid)	Lake 5	LK5K2D
302		Basin_1_B(mid)	Lake 5	LK5K2E
303		Basin_1_B(mid)	Lake 5	LK5K2G
304		Basin_1_B(mid)	Lake 5	LK5K2H
305		Basin_1_B(mid)	Lake 5	LK5K3A
306		Basin_1_B(mid)	Lake 5	LK5K3B
307		Basin_1_B(mid)	Lake 5	LK5K3C
308		Basin_1_B(mid)	Lake 5	LK5K3D
309		Basin_1_B(mid)	Lake 5	LK5K3E
310		Basin_1_B(mid)	Lake 5	LK5K3F
311		Basin_1_B(mid)	Lake 5	LK5K3G
312		Basin_1_B(mid)	Lake 5	LK5K3H
313		Basin_1_B(mid)	Lake 5	LK5K5D
314		Basin_1_B(mid)	Lake 5	LK5K5F
315		Basin_1_B(mid)	Lake 5	LK5K5H
316		Basin_1_B(mid)	Lake 5	LK5K6E
317		Basin_1_B(mid)	Lake 5	LK5K6F
318		Basin_1_B(mid)	Lake 5	LK5K6H
319		Basin_1_B(mid)	Lake 5	LK5K7B
320		Basin_1_B(mid)	Lake 5	LK5K7D
321		Basin_1_B(mid)	Lake 5	LK5K7E
322		Basin_1_B(mid)	Lake 5	LK5K7F
323		Basin_1_B(mid)	Lake 5	LK5K7G
324		Basin_1_B(mid)	Lake 5	LK5K8A
325		Basin_1_B(mid)	Lake 5	LK5K8B
326		Basin_1_B(mid)	Lake 5	LK5K8E
327		Basin_1_B(mid)	Lake 5	LK5K8G
328		Basin_1_B(mid)	Lake 5	LK5K8H
329		Basin_1_C(low)	Lake 3	LK3K1A
330		Basin_1_C(low)	Lake 3	LK3K1F
331		Basin_1_C(low)	Lake 3	LK3K3A
332		Basin_1_C(low)	Lake 3	LK3K3C
333		Basin_1_C(low)	Lake 3	LK3K3D
334		Basin_1_C(low)	Lake 3	LK3K3H
335		Basin_1_C(low)	Lake 3	LK3K6A
336		Basin_1_C(low)	Lake 3	LK3K6E
337		Basin_1_C(low)	Lake 3	LK3K8B
338		Basin_1_C(low)	Lake 3	LK3K9B
339		Basin_1_C(low)	Lake 3	LK3K9F
340		Basin_1_C(low)	Lake 3	LK3K9G
341		Basin_1_C(low)	Lake 3	LK3K9H
342		Basin_2	Lake 1	LK1K1A
343		Basin_2	Lake 1	LK1K1B
344		Basin_2	Lake 1	LK1K1C
345		Basin_2	Lake 1	LK1K1D
346		Basin_2	Lake 1	LK1K1E
347		Basin_2	Lake 1	LK1K1G
348		Basin_2	Lake 1	LK1K2B
349		Basin_2	Lake 1	LK1K2E
350		Basin_2	Lake 1	LK1K2F
351		Basin_2	Lake 1	LK1K2G
352		Basin_2	Lake 1	LK1K2H
353		Basin_2	Lake 1	LK1K7A
354		Basin_2	Lake 1	LK1K7C
355		Basin_2	Lake 1	LK1K7F
356		Basin_2	Lake 1	LK1K7G
357		Basin_2	Lake 1	LK1K7H
358		Basin_2	Lake 1	LK1K9E
359		Basin_3_A(top)	Lake 4	LK4K4F
360		Basin_3_A(top)	Lake 4	LK4K4H
361		Basin_3_A(top)	Lake 4	LK4K7A
362		Basin_3_A(top)	Lake 4	LK4K7G
363		Basin_3_A(top)	Lake 4	LK4K8G
364		Basin_3_A(top)	Lake 4	LK4K9A
365		Basin_3_A(top)	Lake 4	LK4K9C
366		Basin_3_A(top)	Lake 4	LK4K9E
367		Basin_3_A(top)	Lake 4	LK4P9G
368		Basin_3_A(top)	Lake 4	LK4P9H
369		Basin_3_B(low)	Lake 2	LK2K3A
370		Basin_3_B(low)	Lake 2	LK2K4B
371		Basin_3_B(low)	Lake 2	LK2K4E
372		Basin_3_B(low)	Lake 2	LK2K4F
373		Basin_3_B(low)	Lake 2	LK2K6B
374		Basin_3_B(low)	Lake 2	LK2K7A
375		Basin_3_B(low)	Lake 2	LK2K8A
376		Basin_3_B(low)	Lake 2	LK2K8B
377		Basin_3_B(low)	Lake 2	LK2K8C
378		Basin_3_B(low)	Lake 2	LK2K8D
379		Basin_3_B(low)	Lake 2	LK2K8F
380		Basin_3_B(low)	Lake 2	LK2K8H
381		Basin_3_B(low)	Lake 2	LK2K9E
382		Basin_3_B(low)	Lake 2	LK2K9G
383		Basin_4_A(top)	Lake 8	LK8K2D
384		Basin_4_A(top)	Lake 8	LK8K5E
385		Basin_4_A(top)	Lake 8	LK8K7D
386		Basin_4_A(top)	Lake 8	LK8K9F
387		Basin_4_B(low)	Lake 7	LK7K1A
388		Basin_4_B(low)	Lake 7	LK7K1B
389		Basin_4_B(low)	Lake 7	LK7K1C
390		Basin_4_B(low)	Lake 7	LK7K1D
391		Basin_4_B(low)	Lake 7	LK7K1E
392		Basin_4_B(low)	Lake 7	LK7K1F
393		Basin_4_B(low)	Lake 7	LK7K1G
394		Basin_4_B(low)	Lake 7	LK7K1H
395		Basin_4_B(low)	Lake 7	LK7K2C
396		Basin_4_B(low)	Lake 7	LK7K2D
397		Basin_4_B(low)	Lake 7	LK7K2E
398		Basin_4_B(low)	Lake 7	LK7K3A
399		Basin_4_B(low)	Lake 7	LK7K3B
400		Basin_4_B(low)	Lake 7	LK7K3C
401		Basin_4_B(low)	Lake 7	LK7K3D
402		Basin_4_B(low)	Lake 7	LK7K3E
403		Basin_4_B(low)	Lake 7	LK7K3F
404		Basin_4_B(low)	Lake 7	LK7K3G
405		Basin_4_B(low)	Lake 7	LK7K3H
406		Basin_4_B(low)	Lake 7	LK7K4C
407		Basin_4_B(low)	Lake 7	LK7K4D
408		Basin_4_B(low)	Lake 7	LK7K4F
409		Basin_4_B(low)	Lake 7	LK7K5A
410		Basin_4_B(low)	Lake 7	LK7K6A
411		Basin_4_B(low)	Lake 7	LK7K6B
412		Basin_4_B(low)	Lake 7	LK7K6C
413		Basin_4_B(low)	Lake 7	LK7K6D
414		Basin_4_B(low)	Lake 7	LK7K6E
415		Basin_4_B(low)	Lake 7	LK7K6F
416		Basin_4_B(low)	Lake 7	LK7K6G
417		Basin_4_B(low)	Lake 7	LK7K6H
[truncated: 43 more columns]

## Sheet: Lake_sort_SUM_EACH_HT01_HT70
Haplotype#	1	2	3	4	5	6	7	8	9	10	11	12	13	14	15	16	17	18	19	20	21	22	23	24	25	26	27	28	29	30	31	32	33	34	35	36	37	38	39	40	41	42	43	44	45	46	47	48	49
Lake code	01_PG02	02_PG02	03_PG02	04_PG02	05_PG02	06_PG02	07_PG02	08_PG01ex	09_PG01	10_PG01	11_PG01	12_PG01	13_PG10	14_PG07	15_PG07	16_PG07	17_PG07	18_PG09	19_PG09	20_PG09	21_PG09	22_PG09	23_PG14ex	24_PG15ex	25_PG13	26_PG13	27_PG13	28_PG13	29_PG13	30_PG13ex	31_PG13ex	32_PG13ex	33_PAOex	34_PAOex	35_PAOex	36_PAOex	37_PAOex	38_PAOex	39_PAOex	40_PAOex	41_PAOex	42_PAOsx	43_PAOex	44_PG17ex	45_PG17ex	46_PG17ex	47_PG17ex	48_PG17ex	49_PG17ex
ALT
ALT
ALT
ALT
ALT
ALT
ALT
	0	0	0	0	0	0	0	0	0	0	0	0	0	0	0	0	0	0	0	0	1	8	1	0	0	0	0	0	0	0	0	0	0	0	0	0	0	1	0	0	0	0	0	2	0	0	1	0	0
GRU
GRU
GRU
GRU
GRU
GRU
GRU
GRU
	0	0	4	2	4	1	5	0	0	1	0	0	1	2	1	2	4	0	0	0	0	0	0	0	0	0	0	0	1	0	0	2	0	0	0	1	0	0	1	0	0	0	0	0	0	0	2	1	1
TOP
TOP
TOP
TOP
TOP
TOP
TOP
TOP
TOP	0	0	0	7	0	0	0	0	1	0	1	1	0	4	0	7	0	5	0	9	0	0	0	0	0	1	0	1	0	0	0	0	1	0	0	0	1	0	0	0	0	0	0	0	0	0	0	0	0
GOS
GOS
GOS
GOS
GOS
GOS
GOS
GOS
	20	1	0	1	0	0	0	0	0	0	1	0	0	2	0	0	0	0	0	0	0	12	0	2	0	0	0	0	0	0	0	0	0	0	0	0	0	0	0	1	1	0	0	0	0	0	0	0	0
GOL
GOL
GOL
GOL
GOL
GOL
GOL
GOL
	4	0	0	1	0	0	0	0	0	0	0	1	0	0	0	0	0	0	0	0	0	8	0	0	0	0	0	0	0	0	0	0	0	1	0	0	0	0	0	0	0	1	1	0	0	0	0	0	0
HIN
HIN
HIN
HIN
HIN
HIN
HIN
HIN
	16	0	0	0	0	0	0	0	0	0	0	0	0	0	0	2	0	0	0	0	0	0	0	0	0	0	0	0	0	0	0	0	0	0	1	0	0	0	0	0	0	0	0	0	0	0	0	0	0
OSS
OSS
OSS
OSS
OSS
OSS
OSS
OSS
	7	0	1	0	6	0	0	2	0	0	0	0	0	2	0	0	0	1	1	0	0	0	0	0	3	0	1	0	0	2	1	12	0	0	0	0	0	0	0	0	0	0	0	2	1	1	0	0	0
WOR
	0	0	0	0	0	0	0	0	0	0	0	0	0	1	0	0	0	0	0	0	0	0	0	0	0	0	0	0	0	0	0	0	0	0	0	0	0	0	0	0	0	0	0	3	0	0	0	0	0
[truncated: 26 more columns]
